# Supplementary material for: Intensified electrochemiluminescence and photoluminescence via supramolecular anion recognition interactions
Source: Royal Society of Chemistry journal article supplement (doi:10.1039/d4sc03338h), 2024-01-01
Supplement: d4sc03338h1.pdf [file d4sc03338h1.pdf]

*Electronic Supplementary Information for*

**Intensified electrochemiluminescence and photoluminescence via  
supramolecular anion recognition interactions**

Jun Cheng,<sup>†a,c,d</sup> Liuqing Yang,<sup>†b</sup> Ruiyao Wang,<sup>c</sup> James A. Wisner,<sup>b</sup> Zhifeng Ding,<sup>\*b</sup> and Hong-Bo Wang<sup>\*a</sup>

<sup>a</sup> Key Laboratory of Optoelectronic Chemical Materials and Devices, Ministry of Education, School of Optoelectronic Materials and Technology, Jianghan University, Wuhan, Hubei 430056, China. E-mail: hongbo.wang@jhun.edu.cn(H.B.W.)

<sup>b</sup> Department of Chemistry and Centre for Advanced Materials and Biomaterials, The University of Western Ontario, 1151 Richmond Street, London, Ontario N6A 5B7, Canada. E-mail: zfding@uwo.ca (Z.D.)

<sup>c</sup> XJTLU Wisdom Lake Academy of Pharmacy, Xi'an Jiaotong-Liverpool University, 111 Ren'an Road, Suzhou, Jiangsu 215123, China

<sup>d</sup> Department of Chemistry, University of Liverpool, Crown Street, Liverpool L69 7ZD, U.K.

† These authors contributed equally to this work.

**Table of Content**

- 1. Experimental details of synthesis and characterization**
- 2. NMR Spectra of all the synthesized compounds**
- 3. ECL efficiency calculations**
- 4. Absorption and PL spectra**
- 5. Crystallographic data of BIPPD**
- 6. Equal K/ dimerization**
- 7. Theoretical calculation results**

## 1. Experimental details of synthesis and characterization

**3,4-Pyrrole dicarboxylic acid (1):** The synthesis procedure of this intermediate can be referred in publications by Pollack *et al.* and the Sessler group. [1-2]

**2-hexylpyrrole [3, 4-c]pyrrole-1,3-(2H,5H)-dione (2) :** To a suspension of compound **1** (2.75g, 17.7mmol) dissolved in 20 ml tetrahydrofuran (THF), was added a solution of N, N-dicyclohexylcarbodiimide (4.4 g, 21.3mmol) in 30 ml anhydrous THF at nitrogen atmosphere. After stirred and refluxed for 2 hours with a precipitate formed, the mixture was cooled to room temperature and filtered to remove the N, N'-dicyclohexylurea, which could be washed with more THF. The resulting THF solution was concentrated to 15 mL in vacuum, and hexylamine (1 g, 10 mmol) was added via a syringe at N<sub>2</sub> atmosphere. The mixture was subsequently stirred overnight at room temperature. The solvent was removed under vacuum to give a gummy material, and titration with dilute HCl gave a thick paste. An NaOH solution was added and stirred to neutralize the acid and then the solution was filtered to remove excess urea. The filtrate was neutralized with dilute HCl to give a white precipitate, which was filtered and dried giving 1 g 4-(hexylcarbamyl)pyrrole-3-carboxylic acid of white solid (42% yield).

To the solution of compound 4-(hexylcarbamyl)pyrrole-3-carboxylic acid (1 g, 4.18mmol) dissolved in 10 ml of N, N-dimethylformamide (DMF), 15.54 mL of 1mol/L dichloromethane solution of thionyl chloride(SOCl<sub>2</sub>) was added in an ice bath at nitrogen atmosphere. The reaction mixture was stirred at room temperature for 2 hours before quenched by adding a certain amount of ice/water mixture. Saturated NaCl solution was added and extracted 3 times with THF. The organic layer was dried on anhydrous magnesium sulfate, filtered and concentrated. Chromatography of the residue on silica gel using ethyl acetate/petroleum ether (v/v, 1:1) to obtain 0.7g white solid (76%).<sup>1</sup>H NMR (400 MHz, CDCl<sub>3</sub>) δ 9.88 (s, 1H), 7.06 (s, 2H), 3.53 (s, 2H), 1.63-1.55 (m, 2H), 1.26 (s, 9H).

**2-hexyl pyrrole [3,4-c]2,5-dibromopyrrole 1,3-(2H,5H)-dione (3):** Compound **2** (0.7g, 3.2mmol) was dissolved in 20 ml of THF, cooled to -80°C at N<sub>2</sub> atmosphere before N-bromosuccinamide (NBS) (1.2 g,6.7mmol) was added. The temperature was lowered to -70°C for 30 minutes, then to 0°C for 3.5 hours. A small amount of Na<sub>2</sub>SO<sub>3</sub> (about 0.1g) was added, stirring for 15 min, then saturated salt water was added to extract with ethyl acetate, and added for dried with anhydrous magnesium sulfate (MgSO<sub>4</sub>), filtration and concentration. Chromatography of the residue on silica gel using petroleum ether/ethyl acetate (v/v, 4 :1) to obtain 0.53g white solid powder (50% yield).<sup>1</sup>H NMR (400 MHz, CDCl<sub>3</sub>) δ 9.04 (s, 1H), 3.64-3.46 (m, 2H), 1.59 (s, 5H), 1.29 (d, J = 3.0Hz, 4H), 0.87 (t, J = 6.7Hz, 2H).

**2-hexyl-4, 6-bis(1H-indole) pyrrole[3,4-c] pyrrole-1,3-(2H,5H)-dione (BIPPD):** In a dry round-bottomed flask, compound **3** (378mg, 1mmol), PdCl<sub>2</sub>(PPh<sub>3</sub>)<sub>2</sub>(140mg,20 mol %), N-Boc-indole-2-boronic acid (627mg ,2.4mmol) and potassium carbonate (691mg ,5mmol) were added to degas by nitrogen flow for 15 min. At the same time, another flask was added with 5ml DMF and 1ml water and degassed by a nitrogen stream for 15 minutes. Then the flask containing the reactants was added. The reaction mixture was transferred to an oil bath and heated to 120°C for 5h. After the reaction, the solvent was removed under vacuum distillation. Chromatography of the residue on silica gel using petroleum ether/dichloromethane (v/v, 2:1)to obtain 110mg yellow solid(26% yield) <sup>1</sup>H NMR (400 MHz, CDCl<sub>3</sub>) δ 10.31 (s, 2H), 9.24 (s, 1H), 7.64 (d, J = 7.9 Hz, 2H), 7.47 (d, J = 8.2 Hz,2H), 7.29 (d, J = 7.9Hz, 2H), 7.16 (t, J = 7.5Hz, 2H), 6.87 (d, J = 1.6Hz, 2H), 3.69 (t, J = 7.3Hz, 2H), 1.73 (dt, J = 15.0, 7.6Hz, 2H), 1.43 -- 1.31 (m, 6H), 0.94-0.86 (m, 3H);<sup>13</sup>C NMR (101 MHz, CDCl<sub>3</sub>) δ 165.47, 137.00, 128.14, 126.77, 125.90, 124.18, 121.02, 120.77, 115.34, 111.68, 99.58, 38.70,31.47, 28.88, 26.67, 22.57, 14.07.

## 2. NMR Spectra of all the synthesized compounds

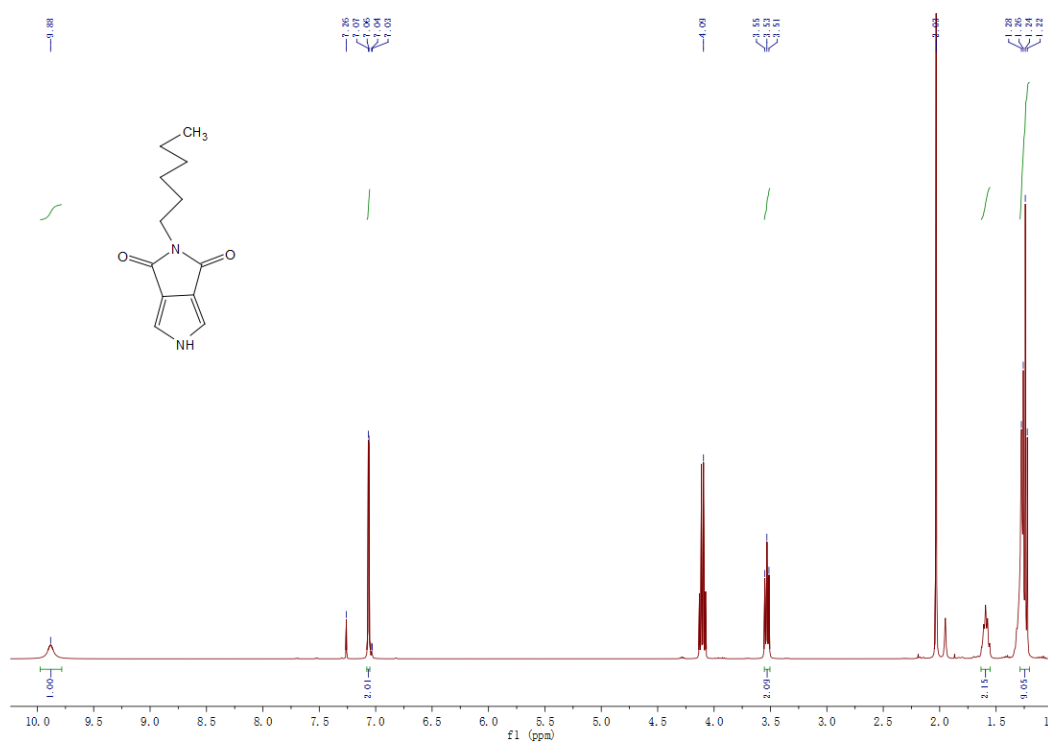

Figure S1. <sup>1</sup>H NMR spectrum of compound 2.

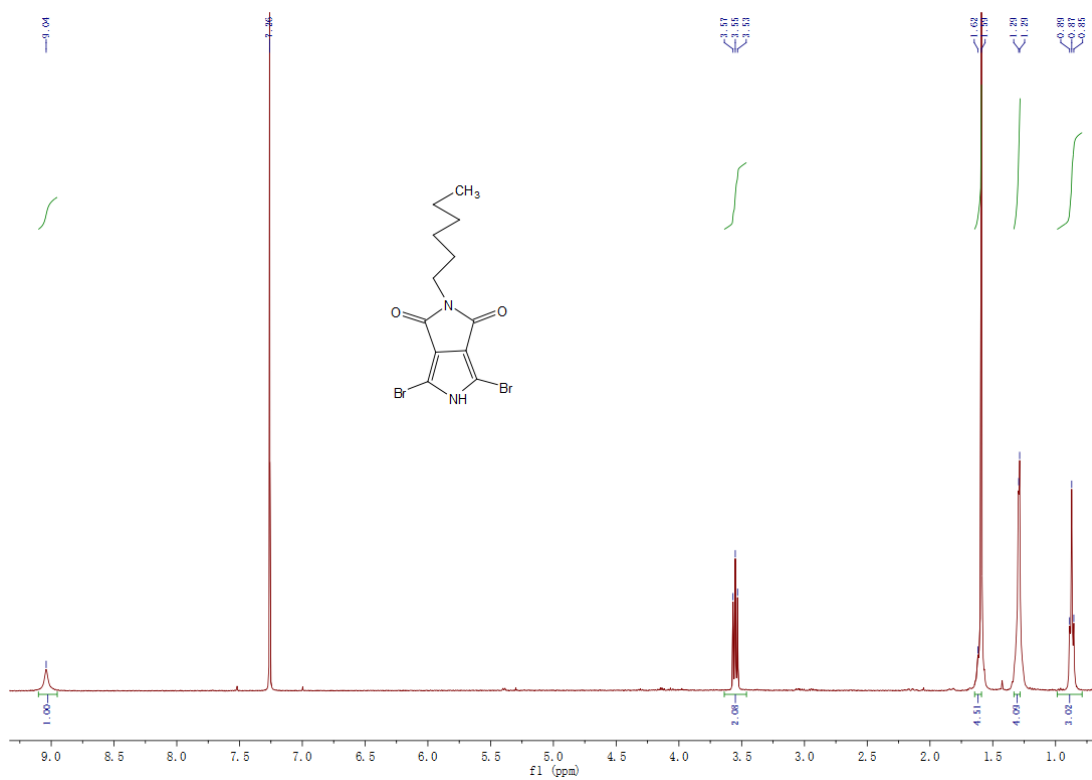

Figure S2. <sup>1</sup>H NMR spectrum of compound 3.

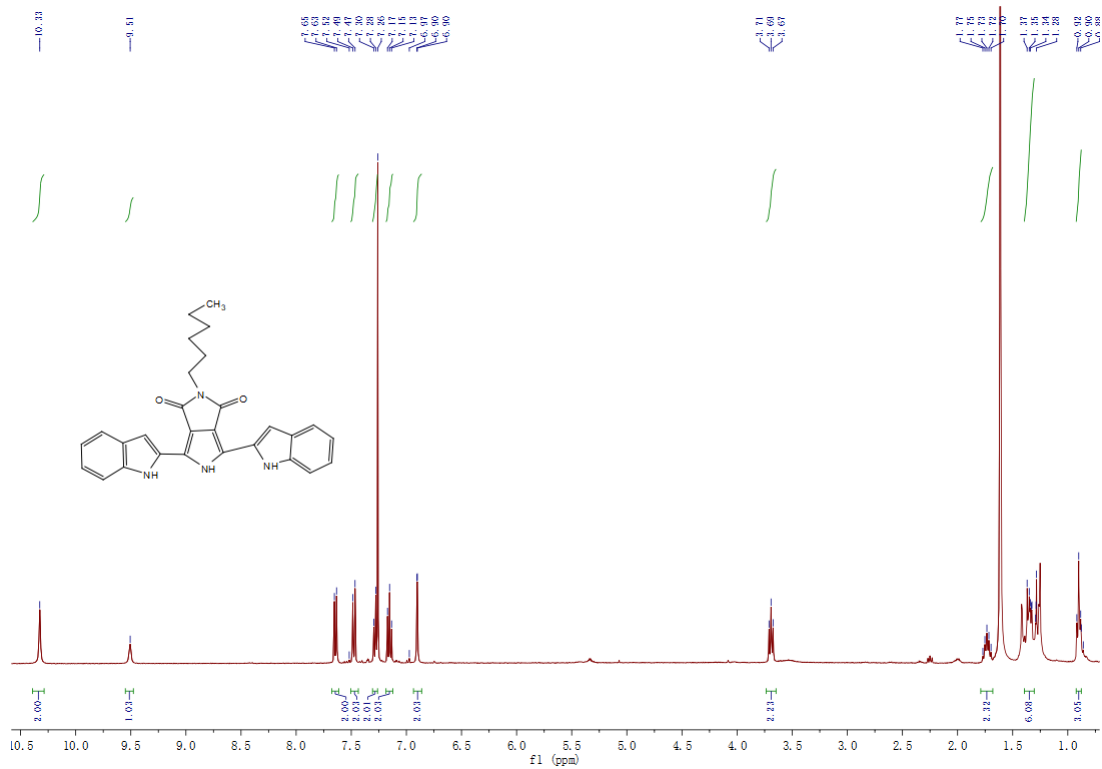

Figure S3. <sup>1</sup>H NMR spectrum of BIPPD.

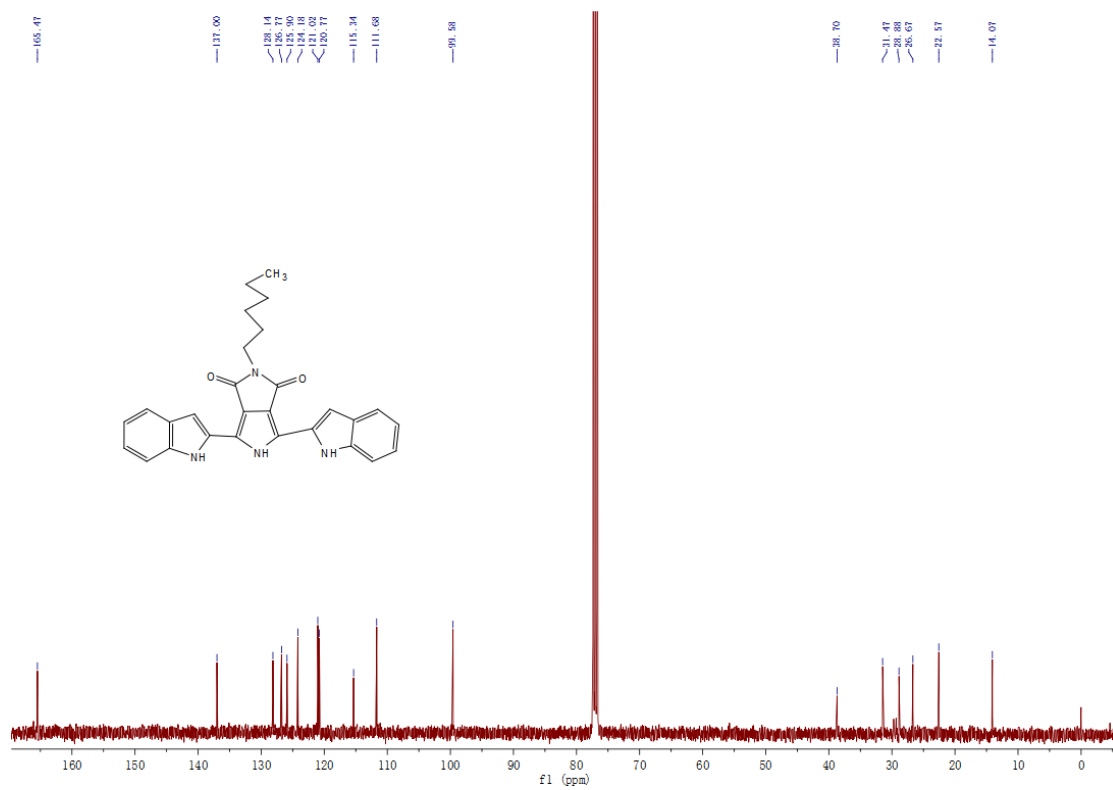

Figure S4. <sup>13</sup>C NMR spectrum of BIPPD.

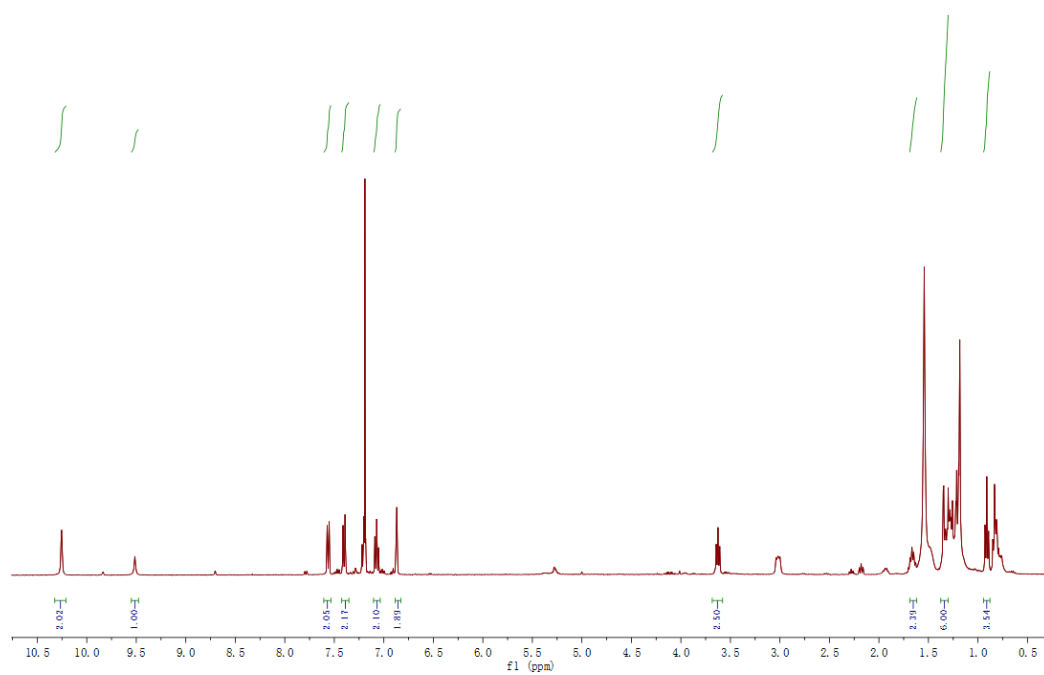

**Figure S5.**  $^1\text{H}$  NMR spectrum of BIPPD added with 1 equivalent of  $\text{PF}_6^-$ .

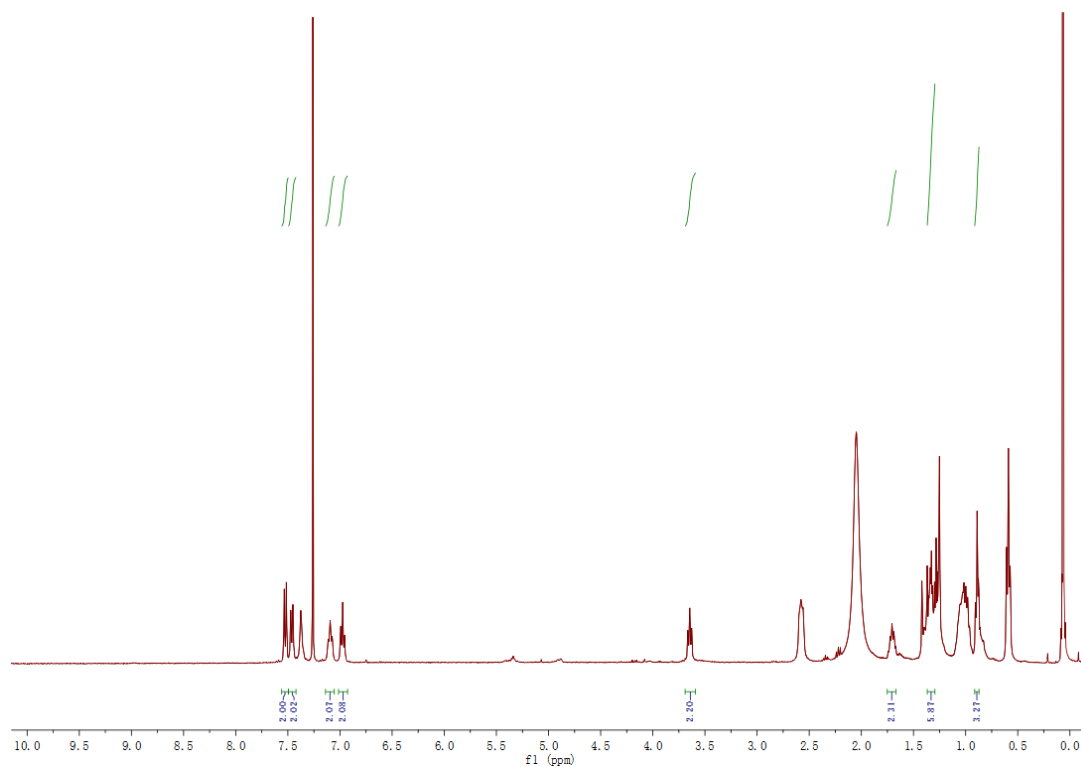

**Figure S6.**  $^1\text{H}$  NMR spectrum of BIPPD added with 1 equivalent of  $\text{TBA-H}_2\text{PO}_4$ .

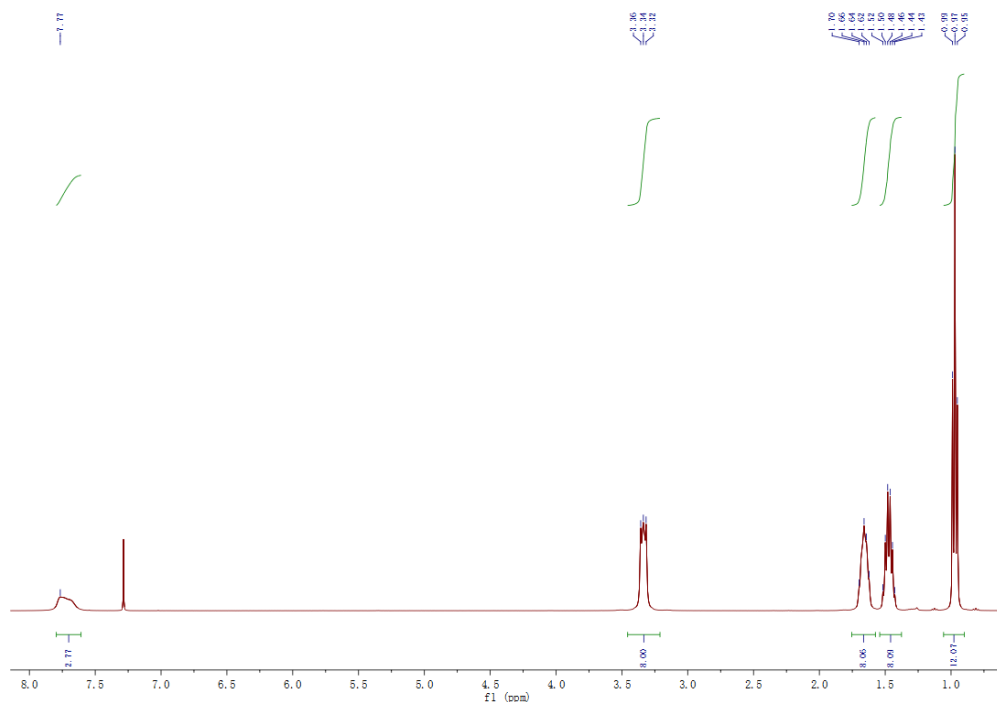

**Figure S7.**  $^1\text{H}$  NMR spectrum of TBA- $\text{H}_2\text{PO}_4$ .

### 3. ECL Efficiency Calculations

ECL quantum efficiency ( $\Phi_x$ ) was calculated relative to 1mM  $\text{Ru}(\text{bpy})_3(\text{PF}_6)_2$  in MeCN in the annihilation pathway whose ECL efficiency was taken as 100%. This was done by taking the sum of the integration of both the ECL intensity and current values (versus time) for the compound against the standard, as described in the following equation S1:

$$\Phi = 100\% \frac{\left[ \frac{\int_b^a \text{ECL} dt}{\int_b^a \text{Current} dt} \right]_x}{\left[ \frac{\int_b^a \text{ECL} dt}{\int_b^a \text{Current} dt} \right]_{\text{Ru}(\text{bpy})_3^{2+}}} \quad (\text{S1})$$

where  $x$  represented studied sample. Equation S1 is based on the principle of generated photons per electron.

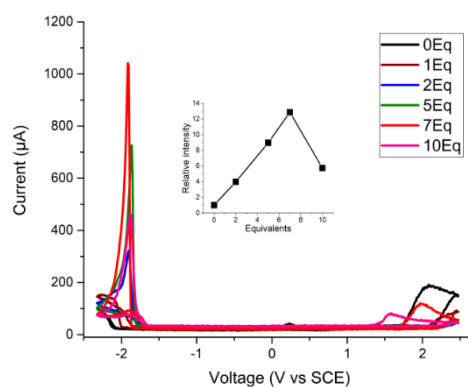

**Figure S8.** The corresponding ECL-voltage curves of 1mM BIPPD doped with various equivalents of  $\text{H}_2\text{PO}_4^-$  in anhydrous acetonitrile with 0.1 M TBAPF<sub>6</sub> as the supporting electrolyte at a scan rate of 0.1 V/s. Inset indicates the relative enhancement result of doping different equivalents of  $\text{H}_2\text{PO}_4^-$ .

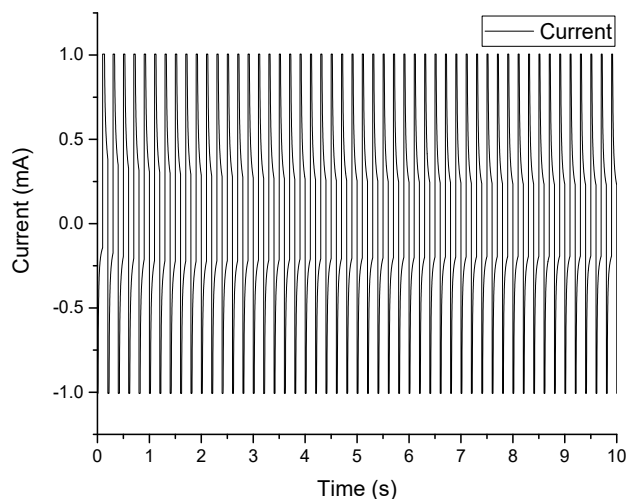

**Figure S9.** A small time window of a 300 s pulsing experiment using 1 mM BIPPD doped with 7 equivalents  $\text{H}_2\text{PO}_4^-$  in anhydrous acetonitrile with 0.1 M  $\text{TBAPF}_6$  as the supporting electrolyte with the applied potential being pulsed between -1.43 and 1.47 V vs. SCE at a frequency of 5 Hz.

#### 4. Extra absorption and PL spectra

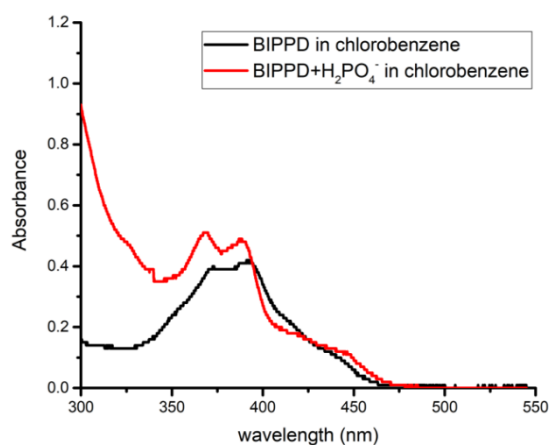

**Figure S10.** UV-vis absorption spectra of BIPPD (black) and BIPPD added with 3 equivalents of  $\text{H}_2\text{PO}_4^-$  (red) in chlorobenzene at a concentration of  $1 \times 10^{-5}$  mol/L.

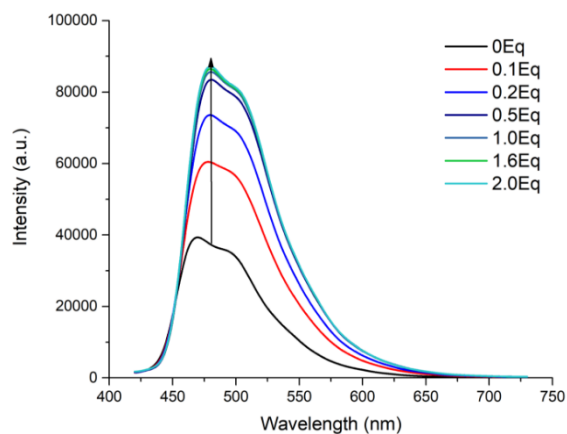

**Figure S11.** PL spectra of BIPPD in chlorobenzene at a concentration of  $1 \times 10^{-5}$  mol/L (black) added with various equivalents of  $\text{H}_2\text{PO}_4^-$ . The excited wavelength was at 390 nm.

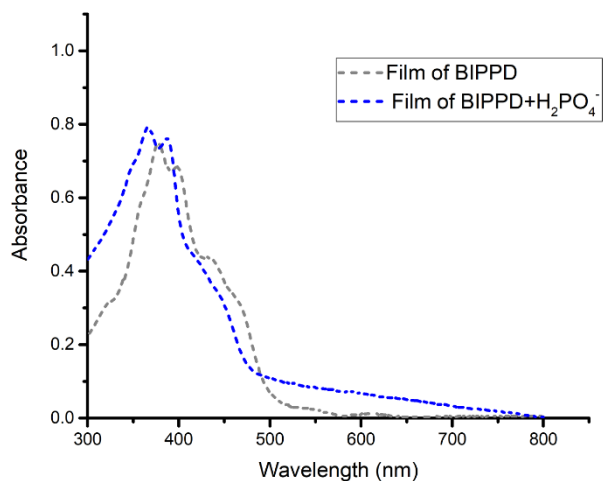

**Figure S12.** UV-visible spectra of BIPPD (gray, dash line) film and its film added with 3 equivalents of H<sub>2</sub>PO<sub>4</sub><sup>-</sup> (blue, dash line).

**Table S1.** The summary of the photophysical and ECL properties of BIPPD and BIPPD/H<sub>2</sub>PO<sub>4</sub><sup>-</sup> system.

| System                                                | Absorption (nm) |                    | PL (nm)         |             | ECL (nm)        |
|-------------------------------------------------------|-----------------|--------------------|-----------------|-------------|-----------------|
|                                                       | <i>Solution</i> | <i>Film</i>        | <i>Solution</i> | <i>Film</i> | <i>Solution</i> |
| <b>BIPPD</b>                                          | 295, 372, 392   | 196, 230, 366, 386 | 470, 488        | 560         | /               |
| <b>BIPPD+ H<sub>2</sub>PO<sub>4</sub><sup>-</sup></b> | 290, 369, 388   | 196, 222, 375, 400 | 480, 492        | 490, 509    | 490             |



## 5. Crystallographic Data of BIPPD

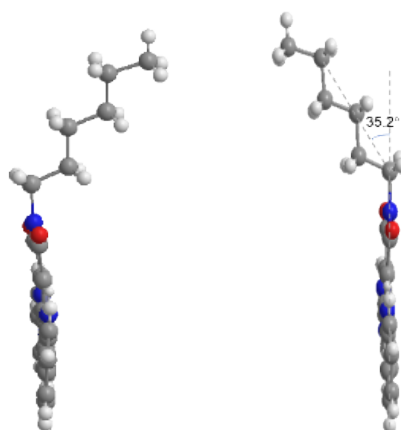

**Figure S13.** Side views of one conformer of BIPPD found within a unit cell of the determined crystal structure.

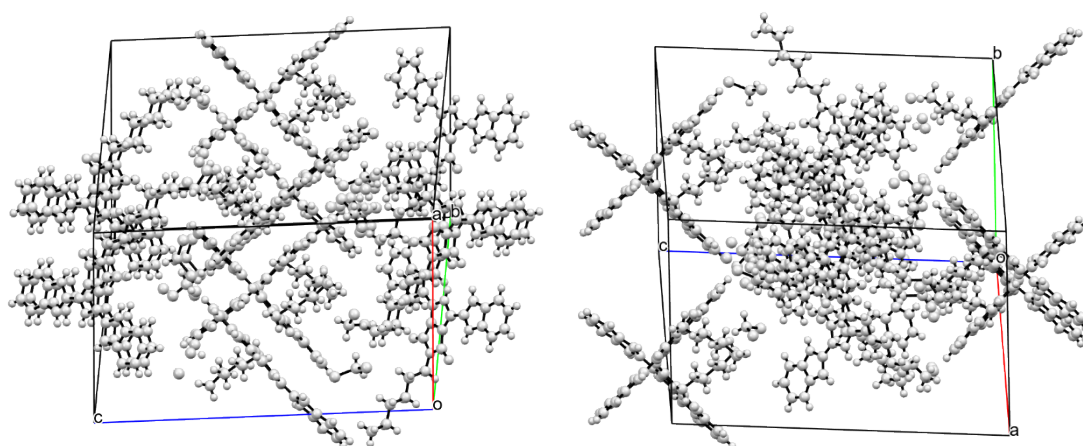

**Figure S14.** The X-ray crystal structure of BIPPD within the packing system in different views.

**Table S2.** Crystal data and structure refinement for BIPPD.

|                                 |                                                                                                                           |
|---------------------------------|---------------------------------------------------------------------------------------------------------------------------|
| Identification code             | BIPPD                                                                                                                     |
| Empirical formula               | C <sub>28.75</sub> H <sub>27.50</sub> Cl <sub>1.50</sub> N <sub>4</sub> O <sub>2</sub>                                    |
| Formula weight                  | 514.22                                                                                                                    |
| Temperature                     | 295(2) K                                                                                                                  |
| Wavelength                      | 1.54178 Å                                                                                                                 |
| Crystal system, space group     | Monoclinic, C c                                                                                                           |
| Unit cell dimensions            | a = 20.4511(4) Å    alpha = 90 deg.<br>b = 20.4148(4) Å    beta = 96.9050(10) deg.<br>c = 25.8502(6) Å    gamma = 90 deg. |
| Volume                          | 10714.3(4) Å <sup>3</sup>                                                                                                 |
| Z, Calculated density           | 16, 1.275 Mg/m <sup>3</sup>                                                                                               |
| Absorption coefficient          | 1.981 mm <sup>-1</sup>                                                                                                    |
| F(000)                          | 4312                                                                                                                      |
| Crystal size                    | 0.150 x 0.150 x 0.100 mm                                                                                                  |
| Theta range for data collection | 3.390 to 74.884 deg.                                                                                                      |

|                                   |                                             |
|-----------------------------------|---------------------------------------------|
| Limiting indices                  | -25<=h<=25, -25<=k<=25, -32<=l<=32          |
| Reflections collected / unique    | 124927 / 21774 [R(int) = 0.0600]            |
| Completeness to theta = 67.679    | 99.9 %                                      |
| Absorption correction             | Empirical (Bruker SADABS)                   |
| Max. and min. transmission        | 0.7538 and 0.5563                           |
| Refinement method                 | Full-matrix least-squares on F <sup>2</sup> |
| Data / restraints / parameters    | 21774 / 20 / 1304                           |
| Goodness-of-fit on F <sup>2</sup> | 1.021                                       |
| Final R indices [I>2sigma(I)]     | R1 = 0.0585, wR2 = 0.1557                   |
| R indices (all data)              | R1 = 0.0718, wR2 = 0.1731                   |
| Absolute structure parameter      | 0.22(3)                                     |
| Extinction coefficient            | 0.00015(3)                                  |
| Largest diff. peak and hole       | 0.370 and -0.482 e.A <sup>-3</sup>          |

**Table S3.** Atomic coordinates ( $\times 10^4$ ) and equivalent isotropic displacement parameters ( $\text{Å}^2 \times 10^3$ ) for BIPPD.  $U(\text{eq})$  is defined as one third of the trace of the orthogonalized  $U_{ij}$  tensor.

| x     | y       | z       | U(eq)   |       |
|-------|---------|---------|---------|-------|
| O(1)  | 5320(1) | 8571(2) | 390(1)  | 49(1) |
| O(2)  | 3498(2) | 9142(2) | -743(1) | 57(1) |
| O(3)  | 2831(2) | 3926(1) | 5366(1) | 46(1) |
| O(4)  | 3236(2) | 5621(2) | 4278(1) | 56(1) |
| O(5)  | 7102(2) | 4543(1) | 4558(1) | 48(1) |
| O(6)  | 6658(2) | 2894(2) | 5681(1) | 55(1) |
| O(7)  | 6450(2) | 7621(2) | 5674(1) | 56(1) |
| O(8)  | 4594(1) | 7024(2) | 4588(1) | 47(1) |
| N(1)  | 4474(2) | 8992(2) | -199(2) | 45(1) |
| N(2)  | 3514(2) | 7247(2) | 171(1)  | 39(1) |
| N(3)  | 5142(2) | 7224(2) | 980(2)  | 45(1) |
| N(4)  | 2433(2) | 8141(2) | -853(1) | 43(1) |
| N(5)  | 3164(2) | 4703(2) | 4796(2) | 44(1) |
| N(6)  | 1490(2) | 5706(2) | 5206(1) | 41(1) |
| N(7)  | 1629(2) | 4173(2) | 5990(2) | 47(1) |
| N(8)  | 2178(2) | 6663(2) | 4182(2) | 55(1) |
| N(9)  | 6753(2) | 3796(2) | 5147(2) | 44(1) |
| N(10) | 8421(2) | 2741(2) | 4776(1) | 39(1) |
| N(11) | 8337(2) | 4256(2) | 3970(2) | 48(1) |
| N(12) | 7663(2) | 1827(2) | 5795(2) | 44(1) |
| N(13) | 5455(2) | 7462(2) | 5152(2) | 44(1) |
| N(14) | 6433(2) | 5745(2) | 4735(1) | 38(1) |
| N(15) | 7525(2) | 6626(2) | 5754(2) | 45(1) |
| N(16) | 4782(2) | 5696(2) | 3964(2) | 47(1) |
| C(1)  | 4764(2) | 8526(2) | 148(2)  | 41(1) |

|       |         |          |          |        |
|-------|---------|----------|----------|--------|
| C(2)  | 4276(2) | 8008(2)  | 149(2)   | 40(1)  |
| C(3)  | 4141(2) | 7423(2)  | 389(2)   | 37(1)  |
| C(4)  | 3844(2) | 8810(2)  | -430(2)  | 44(1)  |
| C(5)  | 3728(2) | 8176(2)  | -205(2)  | 40(1)  |
| C(6)  | 3256(2) | 7699(2)  | -190(2)  | 38(1)  |
| C(7)  | 4511(2) | 7047(2)  | 789(2)   | 40(1)  |
| C(8)  | 4331(2) | 6508(2)  | 1060(2)  | 49(1)  |
| C(9)  | 4871(2) | 6350(2)  | 1438(2)  | 46(1)  |
| C(10) | 4989(3) | 5866(2)  | 1827(2)  | 60(1)  |
| C(11) | 5579(3) | 5855(3)  | 2129(2)  | 65(1)  |
| C(12) | 6070(3) | 6311(3)  | 2059(2)  | 67(1)  |
| C(13) | 5981(2) | 6788(3)  | 1682(2)  | 57(1)  |
| C(14) | 5374(2) | 6807(2)  | 1378(2)  | 43(1)  |
| C(15) | 2617(2) | 7657(2)  | -491(2)  | 40(1)  |
| C(16) | 2112(2) | 7204(2)  | -497(2)  | 42(1)  |
| C(17) | 1597(2) | 7424(2)  | -875(2)  | 43(1)  |
| C(18) | 957(2)  | 7201(2)  | -1049(2) | 52(1)  |
| C(19) | 567(2)  | 7563(3)  | -1413(2) | 60(1)  |
| C(20) | 793(2)  | 8139(3)  | -1621(2) | 60(1)  |
| C(21) | 1420(2) | 8372(3)  | -1466(2) | 51(1)  |
| C(22) | 1813(2) | 8009(2)  | -1092(2) | 42(1)  |
| C(23) | 4813(2) | 9582(2)  | -356(2)  | 52(1)  |
| C(24) | 5193(2) | 9449(3)  | -811(2)  | 58(1)  |
| C(25) | 5634(3) | 10013(3) | -940(2)  | 68(2)  |
| C(26) | 6039(3) | 9834(4)  | -1378(3) | 85(2)  |
| C(27) | 6527(4) | 10351(5) | -1486(4) | 112(3) |
| C(28) | 6961(5) | 10102(7) | -1899(5) | 152(3) |
| C(29) | 2754(2) | 4452(2)  | 5142(2)  | 39(1)  |
| C(30) | 2240(2) | 4940(2)  | 5160(2)  | 39(1)  |
| C(31) | 1698(2) | 5104(2)  | 5411(2)  | 39(1)  |
| C(32) | 2948(2) | 5310(2)  | 4583(2)  | 42(1)  |
| C(33) | 2352(2) | 5451(2)  | 4818(2)  | 39(1)  |
| C(34) | 1881(2) | 5926(2)  | 4845(2)  | 40(1)  |
| C(35) | 1402(2) | 4776(2)  | 5810(2)  | 42(1)  |
| C(36) | 916(2)  | 4979(2)  | 6100(2)  | 54(1)  |
| C(37) | 855(2)  | 4493(2)  | 6482(2)  | 54(1)  |
| C(38) | 461(3)  | 4420(3)  | 6887(3)  | 79(2)  |
| C(39) | 538(4)  | 3883(4)  | 7197(3)  | 87(2)  |
| C(40) | 991(4)  | 3391(3)  | 7120(2)  | 81(2)  |
| C(41) | 1377(3) | 3432(3)  | 6716(2)  | 64(1)  |
| C(42) | 1304(2) | 3992(2)  | 6405(2)  | 48(1)  |
| C(43) | 1778(2) | 6523(2)  | 4558(2)  | 44(1)  |
| C(44) | 1319(2) | 7014(2)  | 4563(2)  | 57(1)  |
| C(45) | 1447(3) | 7473(2)  | 4182(3)  | 70(2)  |

|       |         |         |         |        |
|-------|---------|---------|---------|--------|
| C(46) | 1174(4) | 8082(3) | 4001(3) | 94(2)  |
| C(47) | 1469(5) | 8396(3) | 3596(4) | 105(3) |
| C(48) | 1998(7) | 8156(4) | 3392(4) | 125(4) |
| C(49) | 2276(5) | 7572(3) | 3555(3) | 94(2)  |
| C(50) | 1988(3) | 7245(2) | 3943(2) | 68(2)  |
| C(51) | 3736(2) | 4351(2) | 4638(2) | 49(1)  |
| C(52) | 3540(3) | 3913(2) | 4170(2) | 55(1)  |
| C(53) | 4103(3) | 3491(3) | 4033(3) | 70(2)  |
| C(54) | 3883(4) | 3020(4) | 3581(3) | 94(2)  |
| C(55) | 4420(6) | 2540(6) | 3477(6) | 166(6) |
| C(56) | 4198(9) | 2053(8) | 3083(9) | 225(9) |
| C(57) | 7173(2) | 4016(2) | 4798(2) | 40(1)  |
| C(58) | 7679(2) | 3522(2) | 4797(2) | 38(1)  |
| C(59) | 8222(2) | 3344(2) | 4559(2) | 37(1)  |
| C(60) | 6957(2) | 3188(2) | 5372(2) | 40(1)  |
| C(61) | 7551(2) | 3024(2) | 5151(2) | 40(1)  |
| C(62) | 8017(2) | 2541(2) | 5136(2) | 37(1)  |
| C(63) | 8539(2) | 3646(2) | 4154(2) | 39(1)  |
| C(64) | 9019(2) | 3423(2) | 3882(2) | 50(1)  |
| C(65) | 9126(2) | 3904(2) | 3506(2) | 50(1)  |
| C(66) | 9537(3) | 3945(3) | 3107(2) | 69(1)  |
| C(67) | 9515(4) | 4493(3) | 2807(2) | 81(2)  |
| C(68) | 9087(4) | 5002(3) | 2885(2) | 80(2)  |
| C(69) | 8675(3) | 4981(3) | 3264(2) | 69(2)  |
| C(70) | 8689(2) | 4420(2) | 3571(2) | 49(1)  |
| C(71) | 8102(2) | 1951(2) | 5438(2) | 39(1)  |
| C(72) | 8543(2) | 1443(2) | 5452(2) | 43(1)  |
| C(73) | 8380(2) | 984(2)  | 5834(2) | 44(1)  |
| C(74) | 8622(2) | 373(2)  | 6016(2) | 52(1)  |
| C(75) | 8313(3) | 52(2)   | 6381(2) | 58(1)  |
| C(76) | 7760(3) | 312(3)  | 6580(2) | 59(1)  |
| C(77) | 7508(2) | 913(2)  | 6411(2) | 52(1)  |
| C(78) | 7827(2) | 1244(2) | 6040(2) | 42(1)  |
| C(79) | 6170(2) | 4145(2) | 5272(2) | 50(1)  |
| C(80) | 6319(2) | 4611(2) | 5728(2) | 52(1)  |
| C(81) | 5736(2) | 5051(2) | 5809(2) | 55(1)  |
| C(82) | 5900(3) | 5550(3) | 6235(2) | 64(1)  |
| C(83) | 5340(4) | 6010(3) | 6324(3) | 82(2)  |
| C(84) | 5504(6) | 6515(4) | 6730(4) | 114(3) |
| C(85) | 6098(2) | 7284(2) | 5368(2) | 41(1)  |
| C(86) | 6214(2) | 6655(2) | 5127(2) | 38(1)  |
| C(87) | 6697(2) | 6192(2) | 5103(2) | 37(1)  |
| C(88) | 5161(2) | 6995(2) | 4805(2) | 37(1)  |
| C(89) | 5659(2) | 6485(2) | 4782(2) | 37(1)  |

|        |          |          |          |        |
|--------|----------|----------|----------|--------|
| C(90)  | 5797(2)  | 5913(2)  | 4533(2)  | 38(1)  |
| C(91)  | 7337(2)  | 6139(2)  | 5398(2)  | 39(1)  |
| C(92)  | 7825(2)  | 5683(2)  | 5413(2)  | 46(1)  |
| C(93)  | 8345(2)  | 5891(2)  | 5793(2)  | 46(1)  |
| C(94)  | 8972(2)  | 5643(3)  | 5983(2)  | 60(1)  |
| C(95)  | 9356(3)  | 5994(3)  | 6358(2)  | 68(1)  |
| C(96)  | 9141(3)  | 6585(3)  | 6559(2)  | 69(2)  |
| C(97)  | 8531(3)  | 6833(3)  | 6382(2)  | 61(1)  |
| C(98)  | 8140(2)  | 6486(2)  | 6004(2)  | 47(1)  |
| C(99)  | 5430(2)  | 5549(2)  | 4122(2)  | 40(1)  |
| C(100) | 5629(2)  | 5072(2)  | 3804(2)  | 52(1)  |
| C(101) | 5083(2)  | 4922(2)  | 3427(2)  | 50(1)  |
| C(102) | 4981(3)  | 4496(3)  | 2995(2)  | 70(2)  |
| C(103) | 4374(4)  | 4475(3)  | 2706(2)  | 76(2)  |
| C(104) | 3862(3)  | 4864(4)  | 2840(2)  | 78(2)  |
| C(105) | 3940(3)  | 5293(3)  | 3255(2)  | 66(1)  |
| C(106) | 4559(2)  | 5316(2)  | 3545(2)  | 48(1)  |
| C(107) | 5126(2)  | 8052(2)  | 5307(2)  | 50(1)  |
| C(108) | 4757(2)  | 7942(2)  | 5773(2)  | 54(1)  |
| C(109) | 4324(3)  | 8513(3)  | 5886(2)  | 64(1)  |
| C(110) | 3908(3)  | 8375(4)  | 6318(3)  | 82(2)  |
| C(111) | 3416(5)  | 8922(5)  | 6409(4)  | 121(3) |
| C(112) | 2947(5)  | 8740(8)  | 6778(5)  | 152(3) |
| C(113) | 8792(12) | 1674(9)  | 2409(8)  | 132(3) |
| Cl(1A) | 8867(3)  | 2369(3)  | 2806(3)  | 153(2) |
| Cl(2A) | 7971(3)  | 1483(6)  | 2215(6)  | 158(3) |
| C(114) | 8916(17) | 1840(20) | 2437(11) | 132(3) |
| Cl(1B) | 8868(6)  | 1978(7)  | 3107(5)  | 153(2) |
| Cl(2B) | 8201(9)  | 1514(15) | 2173(14) | 158(3) |
| C(115) | 7200(30) | 5124(19) | 2272(14) | 132(3) |
| Cl(3A) | 7011(9)  | 4910(10) | 2892(8)  | 184(3) |
| Cl(4A) | 7666(11) | 4668(12) | 1943(9)  | 215(3) |
| C(116) | 7576(8)  | 4113(6)  | 2194(6)  | 132(3) |
| Cl(3B) | 7089(3)  | 4675(3)  | 2512(3)  | 184(3) |
| Cl(4B) | 7270(4)  | 3381(4)  | 2109(3)  | 215(3) |
| C(117) | 6516(6)  | 1937(5)  | 7642(4)  | 132(3) |
| Cl(5)  | 7270(2)  | 2134(2)  | 7472(2)  | 180(2) |
| Cl(6)  | 6045(2)  | 1474(2)  | 7201(2)  | 160(1) |

---

**Table S4.** Bond lengths [Å] and angles [deg] for BIPPD.

---

|              |          |
|--------------|----------|
| O(1)-C(1)    | 1.233(5) |
| O(2)-C(4)    | 1.215(5) |
| O(3)-C(29)   | 1.221(5) |
| O(4)-C(32)   | 1.217(5) |
| O(5)-C(57)   | 1.242(5) |
| O(6)-C(60)   | 1.219(5) |
| O(7)-C(85)   | 1.217(5) |
| O(8)-C(88)   | 1.228(5) |
| N(1)-C(1)    | 1.391(5) |
| N(1)-C(4)    | 1.405(5) |
| N(1)-C(23)   | 1.469(5) |
| N(2)-C(6)    | 1.372(5) |
| N(2)-C(3)    | 1.385(5) |
| N(2)-H(2A)   | 0.8600   |
| N(3)-C(7)    | 1.373(5) |
| N(3)-C(14)   | 1.376(6) |
| N(3)-H(3A)   | 0.8600   |
| N(4)-C(22)   | 1.369(5) |
| N(4)-C(15)   | 1.382(6) |
| N(4)-H(4A)   | 0.8600   |
| N(5)-C(29)   | 1.393(5) |
| N(5)-C(32)   | 1.406(5) |
| N(5)-C(51)   | 1.472(5) |
| N(6)-C(34)   | 1.375(6) |
| N(6)-C(31)   | 1.385(5) |
| N(6)-H(6A)   | 0.8600   |
| N(7)-C(35)   | 1.376(5) |
| N(7)-C(42)   | 1.379(6) |
| N(7)-H(7A)   | 0.8600   |
| N(8)-C(43)   | 1.373(6) |
| N(8)-C(50)   | 1.374(6) |
| N(8)-H(8B)   | 0.8600   |
| N(9)-C(57)   | 1.392(6) |
| N(9)-C(60)   | 1.412(5) |
| N(9)-C(79)   | 1.458(5) |
| N(10)-C(62)  | 1.377(5) |
| N(10)-C(59)  | 1.393(5) |
| N(10)-H(10M) | 0.8600   |
| N(11)-C(70)  | 1.366(6) |
| N(11)-C(63)  | 1.380(5) |
| N(11)-H(11I) | 0.8600   |
| N(12)-C(78)  | 1.370(5) |

|              |          |
|--------------|----------|
| N(12)-C(71)  | 1.385(5) |
| N(12)-H(12B) | 0.8600   |
| N(13)-C(88)  | 1.394(5) |
| N(13)-C(85)  | 1.413(5) |
| N(13)-C(107) | 1.459(5) |
| N(14)-C(87)  | 1.380(5) |
| N(14)-C(90)  | 1.385(5) |
| N(14)-H(14A) | 0.8600   |
| N(15)-C(98)  | 1.372(5) |
| N(15)-C(91)  | 1.378(6) |
| N(15)-H(15A) | 0.8600   |
| N(16)-C(106) | 1.367(6) |
| N(16)-C(99)  | 1.372(5) |
| N(16)-H(16B) | 0.8600   |
| C(1)-C(2)    | 1.455(5) |
| C(2)-C(3)    | 1.388(5) |
| C(2)-C(5)    | 1.402(6) |
| C(3)-C(7)    | 1.429(6) |
| C(4)-C(5)    | 1.450(6) |
| C(5)-C(6)    | 1.374(5) |
| C(6)-C(15)   | 1.440(5) |
| C(7)-C(8)    | 1.376(6) |
| C(8)-C(9)    | 1.419(6) |
| C(8)-H(8A)   | 0.9300   |
| C(9)-C(10)   | 1.410(6) |
| C(9)-C(14)   | 1.413(6) |
| C(10)-C(11)  | 1.356(8) |
| C(10)-H(10A) | 0.9300   |
| C(11)-C(12)  | 1.397(9) |
| C(11)-H(11A) | 0.9300   |
| C(12)-C(13)  | 1.374(8) |
| C(12)-H(12A) | 0.9300   |
| C(13)-C(14)  | 1.387(6) |
| C(13)-H(13A) | 0.9300   |
| C(15)-C(16)  | 1.385(6) |
| C(16)-C(17)  | 1.421(6) |
| C(16)-H(16A) | 0.9300   |
| C(17)-C(18)  | 1.407(6) |
| C(17)-C(22)  | 1.413(6) |
| C(18)-C(19)  | 1.374(7) |
| C(18)-H(18A) | 0.9300   |
| C(19)-C(20)  | 1.395(8) |
| C(19)-H(19A) | 0.9300   |
| C(20)-C(21)  | 1.380(7) |

|              |           |
|--------------|-----------|
| C(20)-H(20A) | 0.9300    |
| C(21)-C(22)  | 1.394(6)  |
| C(21)-H(21A) | 0.9300    |
| C(23)-C(24)  | 1.511(8)  |
| C(23)-H(23A) | 0.9700    |
| C(23)-H(23B) | 0.9700    |
| C(24)-C(25)  | 1.524(7)  |
| C(24)-H(24A) | 0.9700    |
| C(24)-H(24B) | 0.9700    |
| C(25)-C(26)  | 1.526(9)  |
| C(25)-H(25A) | 0.9700    |
| C(25)-H(25B) | 0.9700    |
| C(26)-C(27)  | 1.501(10) |
| C(26)-H(26A) | 0.9700    |
| C(26)-H(26B) | 0.9700    |
| C(27)-C(28)  | 1.555(14) |
| C(27)-H(27A) | 0.9700    |
| C(27)-H(27B) | 0.9700    |
| C(28)-H(28A) | 0.9600    |
| C(28)-H(28B) | 0.9600    |
| C(28)-H(28C) | 0.9600    |
| C(29)-C(30)  | 1.454(5)  |
| C(30)-C(31)  | 1.391(5)  |
| C(30)-C(33)  | 1.403(6)  |
| C(31)-C(35)  | 1.425(6)  |
| C(32)-C(33)  | 1.455(6)  |
| C(33)-C(34)  | 1.376(5)  |
| C(34)-C(43)  | 1.429(6)  |
| C(35)-C(36)  | 1.379(6)  |
| C(36)-C(37)  | 1.414(7)  |
| C(36)-H(36A) | 0.9300    |
| C(37)-C(38)  | 1.404(7)  |
| C(37)-C(42)  | 1.405(7)  |
| C(38)-C(39)  | 1.356(10) |
| C(38)-H(38A) | 0.9300    |
| C(39)-C(40)  | 1.397(11) |
| C(39)-H(39A) | 0.9300    |
| C(40)-C(41)  | 1.384(9)  |
| C(40)-H(40A) | 0.9300    |
| C(41)-C(42)  | 1.394(7)  |
| C(41)-H(41A) | 0.9300    |
| C(43)-C(44)  | 1.373(6)  |
| C(44)-C(45)  | 1.407(9)  |
| C(44)-H(44A) | 0.9300    |



|              |           |
|--------------|-----------|
| C(45)-C(50)  | 1.409(10) |
| C(45)-C(46)  | 1.420(8)  |
| C(46)-C(47)  | 1.422(13) |
| C(46)-H(46A) | 0.9300    |
| C(47)-C(48)  | 1.352(15) |
| C(47)-H(47A) | 0.9300    |
| C(48)-C(49)  | 1.367(11) |
| C(48)-H(48A) | 0.9300    |
| C(49)-C(50)  | 1.394(10) |
| C(49)-H(49A) | 0.9300    |
| C(51)-C(52)  | 1.520(7)  |
| C(51)-H(51A) | 0.9700    |
| C(51)-H(51B) | 0.9700    |
| C(52)-C(53)  | 1.515(7)  |
| C(52)-H(52A) | 0.9700    |
| C(52)-H(52B) | 0.9700    |
| C(53)-C(54)  | 1.538(10) |
| C(53)-H(53A) | 0.9700    |
| C(53)-H(53B) | 0.9700    |
| C(54)-C(55)  | 1.519(12) |
| C(54)-H(54A) | 0.9700    |
| C(54)-H(54B) | 0.9700    |
| C(55)-C(56)  | 1.455(18) |
| C(55)-H(55A) | 0.9700    |
| C(55)-H(55B) | 0.9700    |
| C(56)-H(56A) | 0.9600    |
| C(56)-H(56B) | 0.9600    |
| C(56)-H(56C) | 0.9600    |
| C(57)-C(58)  | 1.445(5)  |
| C(58)-C(59)  | 1.383(5)  |
| C(58)-C(61)  | 1.411(6)  |
| C(59)-C(63)  | 1.434(6)  |
| C(60)-C(61)  | 1.444(5)  |
| C(61)-C(62)  | 1.375(5)  |
| C(62)-C(71)  | 1.436(6)  |
| C(63)-C(64)  | 1.354(6)  |
| C(64)-C(65)  | 1.417(7)  |
| C(64)-H(64A) | 0.9300    |
| C(65)-C(70)  | 1.403(7)  |
| C(65)-C(66)  | 1.408(7)  |
| C(66)-C(67)  | 1.360(9)  |
| C(66)-H(66A) | 0.9300    |
| C(67)-C(68)  | 1.389(10) |
| C(67)-H(67A) | 0.9300    |

|              |           |
|--------------|-----------|
| C(68)-C(69)  | 1.368(9)  |
| C(68)-H(68A) | 0.9300    |
| C(69)-C(70)  | 1.392(7)  |
| C(69)-H(69A) | 0.9300    |
| C(71)-C(72)  | 1.371(6)  |
| C(72)-C(73)  | 1.431(6)  |
| C(72)-H(72A) | 0.9300    |
| C(73)-C(74)  | 1.403(6)  |
| C(73)-C(78)  | 1.409(6)  |
| C(74)-C(75)  | 1.365(7)  |
| C(74)-H(74A) | 0.9300    |
| C(75)-C(76)  | 1.401(8)  |
| C(75)-H(75A) | 0.9300    |
| C(76)-C(77)  | 1.382(7)  |
| C(76)-H(76A) | 0.9300    |
| C(77)-C(78)  | 1.397(6)  |
| C(77)-H(77A) | 0.9300    |
| C(79)-C(80)  | 1.519(7)  |
| C(79)-H(79A) | 0.9700    |
| C(79)-H(79B) | 0.9700    |
| C(80)-C(81)  | 1.527(6)  |
| C(80)-H(80A) | 0.9700    |
| C(80)-H(80B) | 0.9700    |
| C(81)-C(82)  | 1.508(8)  |
| C(81)-H(81A) | 0.9700    |
| C(81)-H(81B) | 0.9700    |
| C(82)-C(83)  | 1.519(8)  |
| C(82)-H(82A) | 0.9700    |
| C(82)-H(82B) | 0.9700    |
| C(83)-C(84)  | 1.481(11) |
| C(83)-H(83A) | 0.9700    |
| C(83)-H(83B) | 0.9700    |
| C(84)-H(84A) | 0.9600    |
| C(84)-H(84B) | 0.9600    |
| C(84)-H(84C) | 0.9600    |
| C(85)-C(86)  | 1.459(5)  |
| C(86)-C(87)  | 1.374(5)  |
| C(86)-C(89)  | 1.400(6)  |
| C(87)-C(91)  | 1.439(5)  |
| C(88)-C(89)  | 1.463(5)  |
| C(89)-C(90)  | 1.378(5)  |
| C(90)-C(99)  | 1.434(6)  |
| C(91)-C(92)  | 1.362(6)  |
| C(92)-C(93)  | 1.424(7)  |

|               |           |
|---------------|-----------|
| C(92)-H(92A)  | 0.9300    |
| C(93)-C(94)   | 1.409(6)  |
| C(93)-C(98)   | 1.416(7)  |
| C(94)-C(95)   | 1.372(8)  |
| C(94)-H(94A)  | 0.9300    |
| C(95)-C(96)   | 1.406(9)  |
| C(95)-H(95A)  | 0.9300    |
| C(96)-C(97)   | 1.374(8)  |
| C(96)-H(96A)  | 0.9300    |
| C(97)-C(98)   | 1.381(7)  |
| C(97)-H(97A)  | 0.9300    |
| C(99)-C(100)  | 1.368(6)  |
| C(100)-C(101) | 1.423(7)  |
| C(100)-H(10B) | 0.9300    |
| C(101)-C(106) | 1.402(7)  |
| C(101)-C(102) | 1.412(7)  |
| C(102)-C(103) | 1.371(9)  |
| C(102)-H(10C) | 0.9300    |
| C(103)-C(104) | 1.391(10) |
| C(103)-H(10D) | 0.9300    |
| C(104)-C(105) | 1.378(9)  |
| C(104)-H(10E) | 0.9300    |
| C(105)-C(106) | 1.392(7)  |
| C(105)-H(10F) | 0.9300    |
| C(107)-C(108) | 1.514(7)  |
| C(107)-H(10G) | 0.9700    |
| C(107)-H(10H) | 0.9700    |
| C(108)-C(109) | 1.513(7)  |
| C(108)-H(10I) | 0.9700    |
| C(108)-H(10J) | 0.9700    |
| C(109)-C(110) | 1.511(9)  |
| C(109)-H(10K) | 0.9700    |
| C(109)-H(10L) | 0.9700    |
| C(110)-C(111) | 1.540(11) |
| C(110)-H(11B) | 0.9700    |
| C(110)-H(11C) | 0.9700    |
| C(111)-C(112) | 1.479(13) |
| C(111)-H(11D) | 0.9700    |
| C(111)-H(11E) | 0.9700    |
| C(112)-H(11F) | 0.9600    |
| C(112)-H(11G) | 0.9600    |
| C(112)-H(11H) | 0.9600    |
| C(113)-Cl(2A) | 1.74(2)   |
| C(113)-Cl(1A) | 1.747(19) |

|                  |           |
|------------------|-----------|
| C(113)-H(11I)    | 0.9700    |
| C(113)-H(11J)    | 0.9700    |
| C(114)-Cl(2B)    | 1.68(2)   |
| C(114)-Cl(1B)    | 1.77(2)   |
| C(114)-H(11K)    | 0.9700    |
| C(114)-H(11L)    | 0.9700    |
| C(115)-Cl(4A)    | 1.64(2)   |
| C(115)-Cl(3A)    | 1.75(2)   |
| C(115)-H(11M)    | 0.9700    |
| C(115)-H(11N)    | 0.9700    |
| C(116)-Cl(4B)    | 1.625(14) |
| C(116)-Cl(3B)    | 1.785(13) |
| C(116)-H(11O)    | 0.9700    |
| C(116)-H(11P)    | 0.9700    |
| C(117)-Cl(6)     | 1.691(12) |
| C(117)-Cl(5)     | 1.700(11) |
| C(117)-H(11Q)    | 0.9700    |
| C(117)-H(11R)    | 0.9700    |
|                  |           |
| C(1)-N(1)-C(4)   | 113.0(3)  |
| C(1)-N(1)-C(23)  | 124.0(4)  |
| C(4)-N(1)-C(23)  | 122.6(4)  |
| C(6)-N(2)-C(3)   | 111.3(3)  |
| C(6)-N(2)-H(2A)  | 124.3     |
| C(3)-N(2)-H(2A)  | 124.3     |
| C(7)-N(3)-C(14)  | 109.3(3)  |
| C(7)-N(3)-H(3A)  | 125.3     |
| C(14)-N(3)-H(3A) | 125.3     |
| C(22)-N(4)-C(15) | 109.2(3)  |
| C(22)-N(4)-H(4A) | 125.4     |
| C(15)-N(4)-H(4A) | 125.4     |
| C(29)-N(5)-C(32) | 113.1(3)  |
| C(29)-N(5)-C(51) | 123.9(3)  |
| C(32)-N(5)-C(51) | 122.9(4)  |
| C(34)-N(6)-C(31) | 111.9(3)  |
| C(34)-N(6)-H(6A) | 124.0     |
| C(31)-N(6)-H(6A) | 124.0     |
| C(35)-N(7)-C(42) | 109.2(3)  |
| C(35)-N(7)-H(7A) | 125.4     |
| C(42)-N(7)-H(7A) | 125.4     |
| C(43)-N(8)-C(50) | 109.7(4)  |
| C(43)-N(8)-H(8B) | 125.1     |
| C(50)-N(8)-H(8B) | 125.1     |
| C(57)-N(9)-C(60) | 112.1(3)  |

|                     |          |
|---------------------|----------|
| C(57)-N(9)-C(79)    | 124.8(3) |
| C(60)-N(9)-C(79)    | 123.1(4) |
| C(62)-N(10)-C(59)   | 111.4(3) |
| C(62)-N(10)-H(10M)  | 124.3    |
| C(59)-N(10)-H(10M)  | 124.3    |
| C(70)-N(11)-C(63)   | 108.6(4) |
| C(70)-N(11)-H(11I)  | 125.7    |
| C(63)-N(11)-H(11I)  | 125.7    |
| C(78)-N(12)-C(71)   | 108.9(3) |
| C(78)-N(12)-H(12B)  | 125.6    |
| C(71)-N(12)-H(12B)  | 125.6    |
| C(88)-N(13)-C(85)   | 112.7(3) |
| C(88)-N(13)-C(107)  | 124.4(3) |
| C(85)-N(13)-C(107)  | 122.8(4) |
| C(87)-N(14)-C(90)   | 111.6(3) |
| C(87)-N(14)-H(14A)  | 124.2    |
| C(90)-N(14)-H(14A)  | 124.2    |
| C(98)-N(15)-C(91)   | 109.3(3) |
| C(98)-N(15)-H(15A)  | 125.4    |
| C(91)-N(15)-H(15A)  | 125.4    |
| C(106)-N(16)-C(99)  | 109.2(4) |
| C(106)-N(16)-H(16B) | 125.4    |
| C(99)-N(16)-H(16B)  | 125.4    |
| O(1)-C(1)-N(1)      | 124.8(4) |
| O(1)-C(1)-C(2)      | 130.2(4) |
| N(1)-C(1)-C(2)      | 105.0(3) |
| C(3)-C(2)-C(5)      | 108.5(3) |
| C(3)-C(2)-C(1)      | 143.1(4) |
| C(5)-C(2)-C(1)      | 108.4(3) |
| N(2)-C(3)-C(2)      | 105.4(3) |
| N(2)-C(3)-C(7)      | 122.5(3) |
| C(2)-C(3)-C(7)      | 132.1(3) |
| O(2)-C(4)-N(1)      | 124.5(4) |
| O(2)-C(4)-C(5)      | 130.9(4) |
| N(1)-C(4)-C(5)      | 104.6(3) |
| C(6)-C(5)-C(2)      | 108.5(4) |
| C(6)-C(5)-C(4)      | 142.4(4) |
| C(2)-C(5)-C(4)      | 108.9(3) |
| N(2)-C(6)-C(5)      | 106.4(3) |
| N(2)-C(6)-C(15)     | 125.2(3) |
| C(5)-C(6)-C(15)     | 128.4(4) |
| N(3)-C(7)-C(8)      | 109.0(4) |
| N(3)-C(7)-C(3)      | 120.6(4) |
| C(8)-C(7)-C(3)      | 130.4(4) |

|                    |          |
|--------------------|----------|
| C(7)-C(8)-C(9)     | 107.4(4) |
| C(7)-C(8)-H(8A)    | 126.3    |
| C(9)-C(8)-H(8A)    | 126.3    |
| C(10)-C(9)-C(14)   | 118.4(4) |
| C(10)-C(9)-C(8)    | 134.7(4) |
| C(14)-C(9)-C(8)    | 106.9(4) |
| C(11)-C(10)-C(9)   | 119.2(5) |
| C(11)-C(10)-H(10A) | 120.4    |
| C(9)-C(10)-H(10A)  | 120.4    |
| C(10)-C(11)-C(12)  | 121.2(5) |
| C(10)-C(11)-H(11A) | 119.4    |
| C(12)-C(11)-H(11A) | 119.4    |
| C(13)-C(12)-C(11)  | 121.9(5) |
| C(13)-C(12)-H(12A) | 119.0    |
| C(11)-C(12)-H(12A) | 119.0    |
| C(12)-C(13)-C(14)  | 117.1(5) |
| C(12)-C(13)-H(13A) | 121.5    |
| C(14)-C(13)-H(13A) | 121.5    |
| N(3)-C(14)-C(13)   | 130.3(4) |
| N(3)-C(14)-C(9)    | 107.4(4) |
| C(13)-C(14)-C(9)   | 122.2(4) |
| N(4)-C(15)-C(16)   | 109.1(4) |
| N(4)-C(15)-C(6)    | 118.6(3) |
| C(16)-C(15)-C(6)   | 132.3(4) |
| C(15)-C(16)-C(17)  | 106.7(4) |
| C(15)-C(16)-H(16A) | 126.7    |
| C(17)-C(16)-H(16A) | 126.7    |
| C(18)-C(17)-C(22)  | 118.1(4) |
| C(18)-C(17)-C(16)  | 134.5(4) |
| C(22)-C(17)-C(16)  | 107.4(3) |
| C(19)-C(18)-C(17)  | 119.0(5) |
| C(19)-C(18)-H(18A) | 120.5    |
| C(17)-C(18)-H(18A) | 120.5    |
| C(18)-C(19)-C(20)  | 121.7(4) |
| C(18)-C(19)-H(19A) | 119.1    |
| C(20)-C(19)-H(19A) | 119.1    |
| C(21)-C(20)-C(19)  | 121.2(5) |
| C(21)-C(20)-H(20A) | 119.4    |
| C(19)-C(20)-H(20A) | 119.4    |
| C(20)-C(21)-C(22)  | 117.2(5) |
| C(20)-C(21)-H(21A) | 121.4    |
| C(22)-C(21)-H(21A) | 121.4    |
| N(4)-C(22)-C(21)   | 129.4(4) |
| N(4)-C(22)-C(17)   | 107.7(4) |

|                     |           |
|---------------------|-----------|
| C(21)-C(22)-C(17)   | 122.8(4)  |
| N(1)-C(23)-C(24)    | 111.8(4)  |
| N(1)-C(23)-H(23A)   | 109.3     |
| C(24)-C(23)-H(23A)  | 109.3     |
| N(1)-C(23)-H(23B)   | 109.3     |
| C(24)-C(23)-H(23B)  | 109.3     |
| H(23A)-C(23)-H(23B) | 107.9     |
| C(23)-C(24)-C(25)   | 114.1(5)  |
| C(23)-C(24)-H(24A)  | 108.7     |
| C(25)-C(24)-H(24A)  | 108.7     |
| C(23)-C(24)-H(24B)  | 108.7     |
| C(25)-C(24)-H(24B)  | 108.7     |
| H(24A)-C(24)-H(24B) | 107.6     |
| C(24)-C(25)-C(26)   | 111.7(6)  |
| C(24)-C(25)-H(25A)  | 109.3     |
| C(26)-C(25)-H(25A)  | 109.3     |
| C(24)-C(25)-H(25B)  | 109.3     |
| C(26)-C(25)-H(25B)  | 109.3     |
| H(25A)-C(25)-H(25B) | 107.9     |
| C(27)-C(26)-C(25)   | 113.7(7)  |
| C(27)-C(26)-H(26A)  | 108.8     |
| C(25)-C(26)-H(26A)  | 108.8     |
| C(27)-C(26)-H(26B)  | 108.8     |
| C(25)-C(26)-H(26B)  | 108.8     |
| H(26A)-C(26)-H(26B) | 107.7     |
| C(26)-C(27)-C(28)   | 110.1(10) |
| C(26)-C(27)-H(27A)  | 109.6     |
| C(28)-C(27)-H(27A)  | 109.6     |
| C(26)-C(27)-H(27B)  | 109.6     |
| C(28)-C(27)-H(27B)  | 109.6     |
| H(27A)-C(27)-H(27B) | 108.2     |
| C(27)-C(28)-H(28A)  | 109.5     |
| C(27)-C(28)-H(28B)  | 109.5     |
| H(28A)-C(28)-H(28B) | 109.5     |
| C(27)-C(28)-H(28C)  | 109.5     |
| H(28A)-C(28)-H(28C) | 109.5     |
| H(28B)-C(28)-H(28C) | 109.5     |
| O(3)-C(29)-N(5)     | 125.1(3)  |
| O(3)-C(29)-C(30)    | 129.8(4)  |
| N(5)-C(29)-C(30)    | 105.1(3)  |
| C(31)-C(30)-C(33)   | 108.3(3)  |
| C(31)-C(30)-C(29)   | 143.2(4)  |
| C(33)-C(30)-C(29)   | 108.4(3)  |
| N(6)-C(31)-C(30)    | 105.1(3)  |

|                    |          |
|--------------------|----------|
| N(6)-C(31)-C(35)   | 123.8(3) |
| C(30)-C(31)-C(35)  | 131.1(4) |
| O(4)-C(32)-N(5)    | 124.1(4) |
| O(4)-C(32)-C(33)   | 131.5(4) |
| N(5)-C(32)-C(33)   | 104.4(3) |
| C(34)-C(33)-C(30)  | 108.9(4) |
| C(34)-C(33)-C(32)  | 142.0(4) |
| C(30)-C(33)-C(32)  | 109.0(3) |
| N(6)-C(34)-C(33)   | 105.7(3) |
| N(6)-C(34)-C(43)   | 124.8(4) |
| C(33)-C(34)-C(43)  | 129.5(4) |
| N(7)-C(35)-C(36)   | 108.7(4) |
| N(7)-C(35)-C(31)   | 120.6(3) |
| C(36)-C(35)-C(31)  | 130.6(4) |
| C(35)-C(36)-C(37)  | 107.3(4) |
| C(35)-C(36)-H(36A) | 126.3    |
| C(37)-C(36)-H(36A) | 126.3    |
| C(38)-C(37)-C(42)  | 118.1(5) |
| C(38)-C(37)-C(36)  | 134.4(5) |
| C(42)-C(37)-C(36)  | 107.4(4) |
| C(39)-C(38)-C(37)  | 119.4(6) |
| C(39)-C(38)-H(38A) | 120.3    |
| C(37)-C(38)-H(38A) | 120.3    |
| C(38)-C(39)-C(40)  | 121.9(6) |
| C(38)-C(39)-H(39A) | 119.1    |
| C(40)-C(39)-H(39A) | 119.1    |
| C(41)-C(40)-C(39)  | 120.8(6) |
| C(41)-C(40)-H(40A) | 119.6    |
| C(39)-C(40)-H(40A) | 119.6    |
| C(40)-C(41)-C(42)  | 117.0(6) |
| C(40)-C(41)-H(41A) | 121.5    |
| C(42)-C(41)-H(41A) | 121.5    |
| N(7)-C(42)-C(41)   | 129.9(5) |
| N(7)-C(42)-C(37)   | 107.3(4) |
| C(41)-C(42)-C(37)  | 122.8(5) |
| N(8)-C(43)-C(44)   | 108.8(4) |
| N(8)-C(43)-C(34)   | 118.8(4) |
| C(44)-C(43)-C(34)  | 132.4(5) |
| C(43)-C(44)-C(45)  | 107.1(5) |
| C(43)-C(44)-H(44A) | 126.4    |
| C(45)-C(44)-H(44A) | 126.4    |
| C(44)-C(45)-C(50)  | 108.0(4) |
| C(44)-C(45)-C(46)  | 135.7(7) |
| C(50)-C(45)-C(46)  | 116.3(7) |



|                     |           |
|---------------------|-----------|
| C(45)-C(46)-C(47)   | 117.0(8)  |
| C(45)-C(46)-H(46A)  | 121.5     |
| C(47)-C(46)-H(46A)  | 121.5     |
| C(48)-C(47)-C(46)   | 123.7(7)  |
| C(48)-C(47)-H(47A)  | 118.2     |
| C(46)-C(47)-H(47A)  | 118.2     |
| C(47)-C(48)-C(49)   | 121.2(9)  |
| C(47)-C(48)-H(48A)  | 119.4     |
| C(49)-C(48)-H(48A)  | 119.4     |
| C(48)-C(49)-C(50)   | 116.4(9)  |
| C(48)-C(49)-H(49A)  | 121.8     |
| C(50)-C(49)-H(49A)  | 121.8     |
| N(8)-C(50)-C(49)    | 128.1(6)  |
| N(8)-C(50)-C(45)    | 106.4(5)  |
| C(49)-C(50)-C(45)   | 125.5(6)  |
| N(5)-C(51)-C(52)    | 111.5(4)  |
| N(5)-C(51)-H(51A)   | 109.3     |
| C(52)-C(51)-H(51A)  | 109.3     |
| N(5)-C(51)-H(51B)   | 109.3     |
| C(52)-C(51)-H(51B)  | 109.3     |
| H(51A)-C(51)-H(51B) | 108.0     |
| C(53)-C(52)-C(51)   | 112.7(5)  |
| C(53)-C(52)-H(52A)  | 109.1     |
| C(51)-C(52)-H(52A)  | 109.1     |
| C(53)-C(52)-H(52B)  | 109.1     |
| C(51)-C(52)-H(52B)  | 109.1     |
| H(52A)-C(52)-H(52B) | 107.8     |
| C(52)-C(53)-C(54)   | 111.9(6)  |
| C(52)-C(53)-H(53A)  | 109.2     |
| C(54)-C(53)-H(53A)  | 109.2     |
| C(52)-C(53)-H(53B)  | 109.2     |
| C(54)-C(53)-H(53B)  | 109.2     |
| H(53A)-C(53)-H(53B) | 107.9     |
| C(55)-C(54)-C(53)   | 112.7(8)  |
| C(55)-C(54)-H(54A)  | 109.1     |
| C(53)-C(54)-H(54A)  | 109.1     |
| C(55)-C(54)-H(54B)  | 109.1     |
| C(53)-C(54)-H(54B)  | 109.1     |
| H(54A)-C(54)-H(54B) | 107.8     |
| C(56)-C(55)-C(54)   | 113.2(12) |
| C(56)-C(55)-H(55A)  | 108.9     |
| C(54)-C(55)-H(55A)  | 108.9     |
| C(56)-C(55)-H(55B)  | 108.9     |
| C(54)-C(55)-H(55B)  | 108.9     |

|                     |          |
|---------------------|----------|
| H(55A)-C(55)-H(55B) | 107.8    |
| C(55)-C(56)-H(56A)  | 109.5    |
| C(55)-C(56)-H(56B)  | 109.5    |
| H(56A)-C(56)-H(56B) | 109.5    |
| C(55)-C(56)-H(56C)  | 109.5    |
| H(56A)-C(56)-H(56C) | 109.5    |
| H(56B)-C(56)-H(56C) | 109.5    |
| O(5)-C(57)-N(9)     | 124.0(4) |
| O(5)-C(57)-C(58)    | 130.2(4) |
| N(9)-C(57)-C(58)    | 105.8(3) |
| C(59)-C(58)-C(61)   | 108.7(3) |
| C(59)-C(58)-C(57)   | 142.9(4) |
| C(61)-C(58)-C(57)   | 108.3(4) |
| C(58)-C(59)-N(10)   | 105.3(3) |
| C(58)-C(59)-C(63)   | 132.0(4) |
| N(10)-C(59)-C(63)   | 122.6(3) |
| O(6)-C(60)-N(9)     | 123.9(4) |
| O(6)-C(60)-C(61)    | 131.0(4) |
| N(9)-C(60)-C(61)    | 105.1(3) |
| C(62)-C(61)-C(58)   | 108.4(4) |
| C(62)-C(61)-C(60)   | 142.8(4) |
| C(58)-C(61)-C(60)   | 108.7(3) |
| C(61)-C(62)-N(10)   | 106.3(3) |
| C(61)-C(62)-C(71)   | 128.7(4) |
| N(10)-C(62)-C(71)   | 125.0(3) |
| C(64)-C(63)-N(11)   | 109.2(4) |
| C(64)-C(63)-C(59)   | 130.9(4) |
| N(11)-C(63)-C(59)   | 119.9(3) |
| C(63)-C(64)-C(65)   | 107.8(4) |
| C(63)-C(64)-H(64A)  | 126.1    |
| C(65)-C(64)-H(64A)  | 126.1    |
| C(70)-C(65)-C(66)   | 119.2(5) |
| C(70)-C(65)-C(64)   | 106.5(4) |
| C(66)-C(65)-C(64)   | 134.3(5) |
| C(67)-C(66)-C(65)   | 119.0(6) |
| C(67)-C(66)-H(66A)  | 120.5    |
| C(65)-C(66)-H(66A)  | 120.5    |
| C(66)-C(67)-C(68)   | 120.7(6) |
| C(66)-C(67)-H(67A)  | 119.6    |
| C(68)-C(67)-H(67A)  | 119.6    |
| C(69)-C(68)-C(67)   | 122.2(5) |
| C(69)-C(68)-H(68A)  | 118.9    |
| C(67)-C(68)-H(68A)  | 118.9    |
| C(68)-C(69)-C(70)   | 117.5(6) |

|                     |          |
|---------------------|----------|
| C(68)-C(69)-H(69A)  | 121.2    |
| C(70)-C(69)-H(69A)  | 121.2    |
| N(11)-C(70)-C(69)   | 130.8(5) |
| N(11)-C(70)-C(65)   | 108.0(4) |
| C(69)-C(70)-C(65)   | 121.2(5) |
| C(72)-C(71)-N(12)   | 108.8(4) |
| C(72)-C(71)-C(62)   | 133.1(4) |
| N(12)-C(71)-C(62)   | 118.1(3) |
| C(71)-C(72)-C(73)   | 107.8(4) |
| C(71)-C(72)-H(72A)  | 126.1    |
| C(73)-C(72)-H(72A)  | 126.1    |
| C(74)-C(73)-C(78)   | 118.4(4) |
| C(74)-C(73)-C(72)   | 135.4(4) |
| C(78)-C(73)-C(72)   | 106.1(4) |
| C(75)-C(74)-C(73)   | 118.9(4) |
| C(75)-C(74)-H(74A)  | 120.5    |
| C(73)-C(74)-H(74A)  | 120.5    |
| C(74)-C(75)-C(76)   | 122.3(4) |
| C(74)-C(75)-H(75A)  | 118.9    |
| C(76)-C(75)-H(75A)  | 118.9    |
| C(77)-C(76)-C(75)   | 120.5(5) |
| C(77)-C(76)-H(76A)  | 119.8    |
| C(75)-C(76)-H(76A)  | 119.8    |
| C(76)-C(77)-C(78)   | 117.3(4) |
| C(76)-C(77)-H(77A)  | 121.3    |
| C(78)-C(77)-H(77A)  | 121.3    |
| N(12)-C(78)-C(77)   | 128.9(4) |
| N(12)-C(78)-C(73)   | 108.4(4) |
| C(77)-C(78)-C(73)   | 122.7(4) |
| N(9)-C(79)-C(80)    | 112.7(4) |
| N(9)-C(79)-H(79A)   | 109.1    |
| C(80)-C(79)-H(79A)  | 109.1    |
| N(9)-C(79)-H(79B)   | 109.1    |
| C(80)-C(79)-H(79B)  | 109.1    |
| H(79A)-C(79)-H(79B) | 107.8    |
| C(79)-C(80)-C(81)   | 112.9(4) |
| C(79)-C(80)-H(80A)  | 109.0    |
| C(81)-C(80)-H(80A)  | 109.0    |
| C(79)-C(80)-H(80B)  | 109.0    |
| C(81)-C(80)-H(80B)  | 109.0    |
| H(80A)-C(80)-H(80B) | 107.8    |
| C(82)-C(81)-C(80)   | 112.8(5) |
| C(82)-C(81)-H(81A)  | 109.0    |
| C(80)-C(81)-H(81A)  | 109.0    |

|                     |          |
|---------------------|----------|
| C(82)-C(81)-H(81B)  | 109.0    |
| C(80)-C(81)-H(81B)  | 109.0    |
| H(81A)-C(81)-H(81B) | 107.8    |
| C(81)-C(82)-C(83)   | 115.0(5) |
| C(81)-C(82)-H(82A)  | 108.5    |
| C(83)-C(82)-H(82A)  | 108.5    |
| C(81)-C(82)-H(82B)  | 108.5    |
| C(83)-C(82)-H(82B)  | 108.5    |
| H(82A)-C(82)-H(82B) | 107.5    |
| C(84)-C(83)-C(82)   | 115.3(7) |
| C(84)-C(83)-H(83A)  | 108.5    |
| C(82)-C(83)-H(83A)  | 108.5    |
| C(84)-C(83)-H(83B)  | 108.5    |
| C(82)-C(83)-H(83B)  | 108.5    |
| H(83A)-C(83)-H(83B) | 107.5    |
| C(83)-C(84)-H(84A)  | 109.5    |
| C(83)-C(84)-H(84B)  | 109.5    |
| H(84A)-C(84)-H(84B) | 109.5    |
| C(83)-C(84)-H(84C)  | 109.5    |
| H(84A)-C(84)-H(84C) | 109.5    |
| H(84B)-C(84)-H(84C) | 109.5    |
| O(7)-C(85)-N(13)    | 124.2(4) |
| O(7)-C(85)-C(86)    | 131.3(4) |
| N(13)-C(85)-C(86)   | 104.4(3) |
| C(87)-C(86)-C(89)   | 109.4(3) |
| C(87)-C(86)-C(85)   | 141.2(4) |
| C(89)-C(86)-C(85)   | 109.3(3) |
| C(86)-C(87)-N(14)   | 105.2(3) |
| C(86)-C(87)-C(91)   | 129.9(4) |
| N(14)-C(87)-C(91)   | 124.8(3) |
| O(8)-C(88)-N(13)    | 124.8(3) |
| O(8)-C(88)-C(89)    | 129.8(4) |
| N(13)-C(88)-C(89)   | 105.4(3) |
| C(90)-C(89)-C(86)   | 108.2(3) |
| C(90)-C(89)-C(88)   | 143.5(4) |
| C(86)-C(89)-C(88)   | 108.2(3) |
| C(89)-C(90)-N(14)   | 105.6(3) |
| C(89)-C(90)-C(99)   | 131.9(3) |
| N(14)-C(90)-C(99)   | 122.4(3) |
| C(92)-C(91)-N(15)   | 109.2(4) |
| C(92)-C(91)-C(87)   | 133.2(4) |
| N(15)-C(91)-C(87)   | 117.6(3) |
| C(91)-C(92)-C(93)   | 107.5(4) |
| C(91)-C(92)-H(92A)  | 126.3    |

|                      |          |
|----------------------|----------|
| C(93)-C(92)-H(92A)   | 126.3    |
| C(94)-C(93)-C(98)    | 118.2(5) |
| C(94)-C(93)-C(92)    | 134.9(5) |
| C(98)-C(93)-C(92)    | 106.8(4) |
| C(95)-C(94)-C(93)    | 118.6(5) |
| C(95)-C(94)-H(94A)   | 120.7    |
| C(93)-C(94)-H(94A)   | 120.7    |
| C(94)-C(95)-C(96)    | 122.1(5) |
| C(94)-C(95)-H(95A)   | 118.9    |
| C(96)-C(95)-H(95A)   | 118.9    |
| C(97)-C(96)-C(95)    | 120.2(5) |
| C(97)-C(96)-H(96A)   | 119.9    |
| C(95)-C(96)-H(96A)   | 119.9    |
| C(96)-C(97)-C(98)    | 118.3(5) |
| C(96)-C(97)-H(97A)   | 120.8    |
| C(98)-C(97)-H(97A)   | 120.8    |
| N(15)-C(98)-C(97)    | 130.2(5) |
| N(15)-C(98)-C(93)    | 107.2(4) |
| C(97)-C(98)-C(93)    | 122.6(4) |
| C(100)-C(99)-N(16)   | 109.0(4) |
| C(100)-C(99)-C(90)   | 130.3(4) |
| N(16)-C(99)-C(90)    | 120.5(4) |
| C(99)-C(100)-C(101)  | 107.3(4) |
| C(99)-C(100)-H(10B)  | 126.3    |
| C(101)-C(100)-H(10B) | 126.3    |
| C(106)-C(101)-C(102) | 118.7(5) |
| C(106)-C(101)-C(100) | 106.6(4) |
| C(102)-C(101)-C(100) | 134.7(5) |
| C(103)-C(102)-C(101) | 119.3(6) |
| C(103)-C(102)-H(10C) | 120.4    |
| C(101)-C(102)-H(10C) | 120.4    |
| C(102)-C(103)-C(104) | 120.3(5) |
| C(102)-C(103)-H(10D) | 119.8    |
| C(104)-C(103)-H(10D) | 119.8    |
| C(105)-C(104)-C(103) | 122.5(5) |
| C(105)-C(104)-H(10E) | 118.8    |
| C(103)-C(104)-H(10E) | 118.8    |
| C(104)-C(105)-C(106) | 117.0(5) |
| C(104)-C(105)-H(10F) | 121.5    |
| C(106)-C(105)-H(10F) | 121.5    |
| N(16)-C(106)-C(105)  | 129.9(5) |
| N(16)-C(106)-C(101)  | 107.9(4) |
| C(105)-C(106)-C(101) | 122.2(5) |
| N(13)-C(107)-C(108)  | 112.7(4) |

|                      |           |
|----------------------|-----------|
| N(13)-C(107)-H(10G)  | 109.1     |
| C(108)-C(107)-H(10G) | 109.1     |
| N(13)-C(107)-H(10H)  | 109.1     |
| C(108)-C(107)-H(10H) | 109.1     |
| H(10G)-C(107)-H(10H) | 107.8     |
| C(109)-C(108)-C(107) | 113.4(5)  |
| C(109)-C(108)-H(10I) | 108.9     |
| C(107)-C(108)-H(10I) | 108.9     |
| C(109)-C(108)-H(10J) | 108.9     |
| C(107)-C(108)-H(10J) | 108.9     |
| H(10I)-C(108)-H(10J) | 107.7     |
| C(110)-C(109)-C(108) | 113.1(5)  |
| C(110)-C(109)-H(10K) | 109.0     |
| C(108)-C(109)-H(10K) | 109.0     |
| C(110)-C(109)-H(10L) | 109.0     |
| C(108)-C(109)-H(10L) | 109.0     |
| H(10K)-C(109)-H(10L) | 107.8     |
| C(109)-C(110)-C(111) | 114.4(7)  |
| C(109)-C(110)-H(11B) | 108.7     |
| C(111)-C(110)-H(11B) | 108.7     |
| C(109)-C(110)-H(11C) | 108.7     |
| C(111)-C(110)-H(11C) | 108.7     |
| H(11B)-C(110)-H(11C) | 107.6     |
| C(112)-C(111)-C(110) | 113.7(10) |
| C(112)-C(111)-H(11D) | 108.8     |
| C(110)-C(111)-H(11D) | 108.8     |
| C(112)-C(111)-H(11E) | 108.8     |
| C(110)-C(111)-H(11E) | 108.8     |
| H(11D)-C(111)-H(11E) | 107.7     |
| C(111)-C(112)-H(11F) | 109.5     |
| C(111)-C(112)-H(11G) | 109.5     |
| H(11F)-C(112)-H(11G) | 109.5     |
| C(111)-C(112)-H(11H) | 109.5     |
| H(11F)-C(112)-H(11H) | 109.5     |
| H(11G)-C(112)-H(11H) | 109.5     |
| Cl(2A)-C(113)-Cl(1A) | 111.5(13) |
| Cl(2A)-C(113)-H(11I) | 109.3     |
| Cl(1A)-C(113)-H(11I) | 109.3     |
| Cl(2A)-C(113)-H(11J) | 109.3     |
| Cl(1A)-C(113)-H(11J) | 109.3     |
| H(11I)-C(113)-H(11J) | 108.0     |
| Cl(2B)-C(114)-Cl(1B) | 108(2)    |
| Cl(2B)-C(114)-H(11K) | 110.1     |
| Cl(1B)-C(114)-H(11K) | 110.1     |

|                      |          |
|----------------------|----------|
| Cl(2B)-C(114)-H(11L) | 110.1    |
| Cl(1B)-C(114)-H(11L) | 110.1    |
| H(11K)-C(114)-H(11L) | 108.4    |
| Cl(4A)-C(115)-Cl(3A) | 123(2)   |
| Cl(4A)-C(115)-H(11M) | 106.7    |
| Cl(3A)-C(115)-H(11M) | 106.7    |
| Cl(4A)-C(115)-H(11N) | 106.7    |
| Cl(3A)-C(115)-H(11N) | 106.7    |
| H(11M)-C(115)-H(11N) | 106.6    |
| Cl(4B)-C(116)-Cl(3B) | 115.2(9) |
| Cl(4B)-C(116)-H(11O) | 108.5    |
| Cl(3B)-C(116)-H(11O) | 108.5    |
| Cl(4B)-C(116)-H(11P) | 108.5    |
| Cl(3B)-C(116)-H(11P) | 108.5    |
| H(11O)-C(116)-H(11P) | 107.5    |
| Cl(6)-C(117)-Cl(5)   | 114.8(6) |
| Cl(6)-C(117)-H(11Q)  | 108.6    |
| Cl(5)-C(117)-H(11Q)  | 108.6    |
| Cl(6)-C(117)-H(11R)  | 108.6    |
| Cl(5)-C(117)-H(11R)  | 108.6    |
| H(11Q)-C(117)-H(11R) | 107.5    |

---

Symmetry transformations used to generate equivalent atoms:

**Table S5.** Anisotropic displacement parameters ( $\text{\AA}^2 \times 10^3$ ) for BIPPD. The anisotropic displacement factor exponent takes the form:  $-2 \pi^2 [ h^2 a^{*2} U_{11} + \dots + 2 h k a^* b^* U_{12} ]$

---

| U11  | U22   | U33   | U23   | U13    | U12         |
|------|-------|-------|-------|--------|-------------|
| O(1) | 33(1) | 49(2) | 64(2) | 10(1)  | 2(1) -12(1) |
| O(2) | 49(2) | 50(2) | 71(2) | 21(2)  | 0(2) -6(1)  |
| O(3) | 45(2) | 32(1) | 63(2) | 2(1)   | 11(1) 12(1) |
| O(4) | 58(2) | 47(2) | 68(2) | 6(2)   | 25(2) 8(1)  |
| O(5) | 47(2) | 35(2) | 64(2) | 5(1)   | 14(1) 12(1) |
| O(6) | 56(2) | 48(2) | 67(2) | 7(2)   | 26(2) 10(1) |
| O(7) | 50(2) | 50(2) | 64(2) | -17(2) | 1(2) 6(2)   |
| O(8) | 35(1) | 45(2) | 60(2) | -1(1)  | 6(1) 12(1)  |
| N(1) | 36(2) | 40(2) | 60(2) | 11(2)  | 4(2) -10(1) |
| N(2) | 28(1) | 33(2) | 56(2) | 1(1)   | 4(1) -7(1)  |
| N(3) | 35(2) | 44(2) | 55(2) | 6(2)   | 4(1) -9(1)  |
| N(4) | 37(2) | 38(2) | 54(2) | 4(2)   | 2(1) -6(1)  |
| N(5) | 40(2) | 36(2) | 60(2) | 1(2)   | 16(2) 12(1) |

|       |        |        |        |        |       |        |
|-------|--------|--------|--------|--------|-------|--------|
| N(6)  | 32(2)  | 34(2)  | 56(2)  | -2(1)  | 8(1)  | 8(1)   |
| N(7)  | 48(2)  | 38(2)  | 57(2)  | -2(2)  | 15(2) | 7(2)   |
| N(8)  | 62(2)  | 40(2)  | 64(2)  | 2(2)   | 8(2)  | 8(2)   |
| N(9)  | 40(2)  | 36(2)  | 60(2)  | 5(2)   | 18(2) | 12(1)  |
| N(10) | 33(2)  | 31(2)  | 54(2)  | 2(1)   | 9(1)  | 9(1)   |
| N(11) | 53(2)  | 36(2)  | 56(2)  | 3(2)   | 12(2) | 10(2)  |
| N(12) | 44(2)  | 34(2)  | 55(2)  | 5(1)   | 12(2) | 8(1)   |
| N(13) | 38(2)  | 35(2)  | 58(2)  | -8(2)  | 4(2)  | 10(1)  |
| N(14) | 32(2)  | 29(2)  | 52(2)  | -1(1)  | 3(1)  | 6(1)   |
| N(15) | 34(2)  | 44(2)  | 56(2)  | -3(2)  | 0(1)  | 8(1)   |
| N(16) | 38(2)  | 53(2)  | 49(2)  | -4(2)  | 6(2)  | 5(2)   |
| C(1)  | 33(2)  | 37(2)  | 55(2)  | 6(2)   | 9(2)  | -6(2)  |
| C(2)  | 32(2)  | 33(2)  | 54(2)  | 3(2)   | 6(2)  | -4(2)  |
| C(3)  | 30(2)  | 32(2)  | 49(2)  | 2(2)   | 3(2)  | -5(1)  |
| C(4)  | 37(2)  | 42(2)  | 52(2)  | 5(2)   | 6(2)  | -8(2)  |
| C(5)  | 32(2)  | 35(2)  | 52(2)  | 4(2)   | 5(2)  | -4(2)  |
| C(6)  | 32(2)  | 33(2)  | 49(2)  | -1(2)  | 6(2)  | -4(1)  |
| C(7)  | 34(2)  | 35(2)  | 49(2)  | 1(2)   | 4(2)  | -1(2)  |
| C(8)  | 39(2)  | 40(2)  | 67(3)  | 6(2)   | 4(2)  | -8(2)  |
| C(9)  | 47(2)  | 37(2)  | 56(2)  | 5(2)   | 9(2)  | 2(2)   |
| C(10) | 71(3)  | 44(2)  | 63(3)  | 13(2)  | 8(2)  | 7(2)   |
| C(11) | 71(3)  | 66(3)  | 57(3)  | 8(2)   | 6(2)  | 17(3)  |
| C(12) | 60(3)  | 93(4)  | 46(3)  | 3(3)   | 0(2)  | 14(3)  |
| C(13) | 43(2)  | 78(3)  | 48(2)  | -1(2)  | 3(2)  | -2(2)  |
| C(14) | 38(2)  | 46(2)  | 46(2)  | 1(2)   | 7(2)  | 2(2)   |
| C(15) | 31(2)  | 38(2)  | 51(2)  | -3(2)  | 4(2)  | -2(2)  |
| C(16) | 34(2)  | 33(2)  | 59(3)  | 1(2)   | 4(2)  | -4(2)  |
| C(17) | 32(2)  | 43(2)  | 53(2)  | -8(2)  | 4(2)  | -4(2)  |
| C(18) | 39(2)  | 55(3)  | 62(3)  | -9(2)  | 6(2)  | -12(2) |
| C(19) | 38(2)  | 79(4)  | 61(3)  | -12(3) | -4(2) | -6(2)  |
| C(20) | 48(2)  | 80(4)  | 50(3)  | -6(2)  | -3(2) | 3(2)   |
| C(21) | 47(2)  | 54(3)  | 52(3)  | 2(2)   | 4(2)  | 2(2)   |
| C(22) | 37(2)  | 45(2)  | 46(2)  | -3(2)  | 6(2)  | -4(2)  |
| C(23) | 46(2)  | 38(2)  | 72(3)  | 13(2)  | 7(2)  | -14(2) |
| C(24) | 46(2)  | 56(3)  | 70(3)  | 20(2)  | 2(2)  | -10(2) |
| C(25) | 47(3)  | 75(4)  | 81(4)  | 30(3)  | 6(2)  | -13(2) |
| C(26) | 59(3)  | 109(5) | 88(4)  | 43(4)  | 15(3) | 2(3)   |
| C(27) | 70(4)  | 150(8) | 121(6) | 60(6)  | 33(4) | -8(5)  |
| C(28) | 102(4) | 208(8) | 159(6) | 24(7)  | 68(5) | 6(6)   |
| C(29) | 34(2)  | 34(2)  | 49(2)  | -4(2)  | 9(2)  | 4(2)   |
| C(30) | 37(2)  | 29(2)  | 50(2)  | -1(2)  | 8(2)  | 7(2)   |
| C(31) | 32(2)  | 31(2)  | 53(2)  | -4(2)  | 4(2)  | 5(1)   |
| C(32) | 45(2)  | 36(2)  | 48(2)  | 1(2)   | 11(2) | 6(2)   |
| C(33) | 36(2)  | 33(2)  | 50(2)  | 0(2)   | 8(2)  | 5(2)   |



|       |         |         |         |          |        |        |
|-------|---------|---------|---------|----------|--------|--------|
| C(34) | 37(2)   | 30(2)   | 51(2)   | -2(2)    | 3(2)   | 5(2)   |
| C(35) | 36(2)   | 37(2)   | 52(2)   | -3(2)    | 9(2)   | 3(2)   |
| C(36) | 45(2)   | 48(2)   | 71(3)   | -6(2)    | 20(2)  | 7(2)   |
| C(37) | 54(3)   | 52(3)   | 61(3)   | -10(2)   | 21(2)  | -4(2)  |
| C(38) | 83(4)   | 76(4)   | 86(4)   | -3(3)    | 48(3)  | 3(3)   |
| C(39) | 108(5)  | 88(5)   | 73(4)   | -4(3)    | 48(4)  | -16(4) |
| C(40) | 112(5)  | 74(4)   | 59(3)   | 9(3)     | 20(3)  | -18(4) |
| C(41) | 86(4)   | 48(3)   | 59(3)   | 3(2)     | 11(3)  | -2(2)  |
| C(42) | 52(2)   | 43(2)   | 50(2)   | -4(2)    | 10(2)  | -5(2)  |
| C(43) | 38(2)   | 35(2)   | 57(2)   | -2(2)    | -2(2)  | 6(2)   |
| C(44) | 42(2)   | 40(2)   | 87(4)   | -9(2)    | -2(2)  | 9(2)   |
| C(45) | 76(4)   | 35(2)   | 90(4)   | -3(2)    | -33(3) | 9(2)   |
| C(46) | 117(4)  | 61(3)   | 95(4)   | 4(2)     | -17(3) | 3(3)   |
| C(47) | 146(8)  | 50(3)   | 105(6)  | 16(4)    | -35(5) | 22(4)  |
| C(48) | 212(12) | 63(4)   | 92(6)   | 23(4)    | -4(7)  | 3(6)   |
| C(49) | 117(4)  | 61(3)   | 95(4)   | 4(2)     | -17(3) | 3(3)   |
| C(50) | 102(4)  | 40(2)   | 57(3)   | 8(2)     | -7(3)  | -6(3)  |
| C(51) | 39(2)   | 42(2)   | 70(3)   | -2(2)    | 21(2)  | 12(2)  |
| C(52) | 59(3)   | 41(2)   | 69(3)   | 0(2)     | 25(2)  | 8(2)   |
| C(53) | 72(3)   | 51(3)   | 95(4)   | -6(3)    | 41(3)  | 8(2)   |
| C(54) | 118(6)  | 72(4)   | 103(5)  | -25(4)   | 55(5)  | -2(4)  |
| C(55) | 135(9)  | 142(9)  | 238(14) | -107(10) | 85(9)  | -8(7)  |
| C(56) | 221(17) | 165(13) | 300(20) | -132(15) | 89(16) | 4(12)  |
| C(57) | 37(2)   | 30(2)   | 54(2)   | -2(2)    | 8(2)   | 5(2)   |
| C(58) | 34(2)   | 33(2)   | 49(2)   | 2(2)     | 7(2)   | 7(2)   |
| C(59) | 34(2)   | 32(2)   | 47(2)   | 2(2)     | 8(2)   | 5(2)   |
| C(60) | 38(2)   | 33(2)   | 51(2)   | 2(2)     | 13(2)  | 4(2)   |
| C(61) | 38(2)   | 33(2)   | 51(2)   | 2(2)     | 9(2)   | 6(2)   |
| C(62) | 35(2)   | 32(2)   | 46(2)   | -1(2)    | 4(2)   | 5(2)   |
| C(63) | 38(2)   | 34(2)   | 47(2)   | 0(2)     | 6(2)   | 3(2)   |
| C(64) | 50(2)   | 41(2)   | 62(3)   | 5(2)     | 19(2)  | 9(2)   |
| C(65) | 49(2)   | 50(2)   | 51(2)   | 1(2)     | 10(2)  | 1(2)   |
| C(66) | 76(4)   | 72(3)   | 64(3)   | 7(3)     | 27(3)  | 1(3)   |
| C(67) | 104(5)  | 84(4)   | 61(3)   | 7(3)     | 35(3)  | -17(4) |
| C(68) | 119(5)  | 63(3)   | 60(3)   | 16(3)    | 17(3)  | -16(4) |
| C(69) | 101(4)  | 47(3)   | 60(3)   | 9(2)     | 10(3)  | 1(3)   |
| C(70) | 61(3)   | 39(2)   | 46(2)   | -2(2)    | 3(2)   | -1(2)  |
| C(71) | 36(2)   | 30(2)   | 50(2)   | 1(2)     | 5(2)   | 1(2)   |
| C(72) | 38(2)   | 33(2)   | 59(2)   | 1(2)     | 6(2)   | 6(2)   |
| C(73) | 42(2)   | 35(2)   | 53(2)   | 3(2)     | -1(2)  | 2(2)   |
| C(74) | 50(2)   | 39(2)   | 64(3)   | 4(2)     | -4(2)  | 11(2)  |
| C(75) | 64(3)   | 42(2)   | 65(3)   | 13(2)    | -9(2)  | 3(2)   |
| C(76) | 72(3)   | 53(3)   | 49(3)   | 15(2)    | -1(2)  | -5(2)  |
| C(77) | 55(2)   | 52(2)   | 49(2)   | 7(2)     | 10(2)  | 0(2)   |

|        |        |        |        |        |        |        |
|--------|--------|--------|--------|--------|--------|--------|
| C(78)  | 45(2)  | 33(2)  | 47(2)  | 3(2)   | 0(2)   | 3(2)   |
| C(79)  | 39(2)  | 44(2)  | 69(3)  | 4(2)   | 20(2)  | 13(2)  |
| C(80)  | 52(2)  | 44(2)  | 61(3)  | 6(2)   | 19(2)  | 11(2)  |
| C(81)  | 56(3)  | 49(2)  | 64(3)  | 5(2)   | 25(2)  | 13(2)  |
| C(82)  | 75(3)  | 53(3)  | 70(3)  | -3(2)  | 29(3)  | 3(2)   |
| C(83)  | 91(4)  | 69(4)  | 95(5)  | -11(3) | 39(4)  | 16(3)  |
| C(84)  | 164(9) | 71(4)  | 115(6) | -17(4) | 56(6)  | 21(5)  |
| C(85)  | 38(2)  | 34(2)  | 52(2)  | -3(2)  | 6(2)   | 4(2)   |
| C(86)  | 35(2)  | 33(2)  | 46(2)  | -2(2)  | 5(2)   | 5(2)   |
| C(87)  | 32(2)  | 35(2)  | 45(2)  | 2(2)   | 7(2)   | 3(1)   |
| C(88)  | 33(2)  | 33(2)  | 47(2)  | -1(2)  | 8(2)   | 6(1)   |
| C(89)  | 31(2)  | 30(2)  | 49(2)  | 2(2)   | 4(2)   | 6(1)   |
| C(90)  | 33(2)  | 31(2)  | 49(2)  | 2(2)   | 5(2)   | 3(1)   |
| C(91)  | 32(2)  | 35(2)  | 49(2)  | 4(2)   | 4(2)   | 3(2)   |
| C(92)  | 36(2)  | 42(2)  | 59(3)  | 2(2)   | 3(2)   | 7(2)   |
| C(93)  | 38(2)  | 47(2)  | 54(2)  | 10(2)  | 6(2)   | 7(2)   |
| C(94)  | 45(2)  | 63(3)  | 70(3)  | 14(2)  | 3(2)   | 15(2)  |
| C(95)  | 42(2)  | 86(4)  | 72(3)  | 13(3)  | -6(2)  | 13(2)  |
| C(96)  | 47(3)  | 100(4) | 57(3)  | 2(3)   | -8(2)  | -3(3)  |
| C(97)  | 53(3)  | 67(3)  | 59(3)  | -5(2)  | -2(2)  | 2(2)   |
| C(98)  | 34(2)  | 56(3)  | 50(2)  | 7(2)   | 0(2)   | 2(2)   |
| C(99)  | 34(2)  | 33(2)  | 51(2)  | 1(2)   | 5(2)   | 5(2)   |
| C(100) | 48(2)  | 41(2)  | 66(3)  | -11(2) | 3(2)   | 9(2)   |
| C(101) | 55(2)  | 44(2)  | 50(2)  | -3(2)  | 2(2)   | -1(2)  |
| C(102) | 79(4)  | 63(3)  | 65(3)  | -15(3) | -2(3)  | 6(3)   |
| C(103) | 94(4)  | 81(4)  | 50(3)  | -16(3) | -2(3)  | -12(3) |
| C(104) | 64(3)  | 114(5) | 51(3)  | -3(3)  | -9(2)  | -16(3) |
| C(105) | 44(2)  | 101(4) | 51(3)  | -2(3)  | 3(2)   | -2(3)  |
| C(106) | 45(2)  | 54(3)  | 45(2)  | 4(2)   | 3(2)   | -3(2)  |
| C(107) | 45(2)  | 35(2)  | 69(3)  | -9(2)  | 9(2)   | 10(2)  |
| C(108) | 48(2)  | 54(3)  | 60(3)  | -13(2) | 10(2)  | 7(2)   |
| C(109) | 54(3)  | 60(3)  | 78(3)  | -25(3) | 12(2)  | 7(2)   |
| C(110) | 73(4)  | 89(4)  | 89(4)  | -26(4) | 33(3)  | -6(3)  |
| C(111) | 118(7) | 109(6) | 149(8) | -44(6) | 71(6)  | 9(5)   |
| C(112) | 102(4) | 208(8) | 159(6) | 24(7)  | 68(5)  | 6(6)   |
| C(113) | 172(7) | 107(5) | 128(5) | 9(4)   | 62(5)  | 13(5)  |
| Cl(1A) | 130(3) | 164(5) | 157(5) | -47(3) | -14(3) | -21(3) |
| Cl(2A) | 110(6) | 126(3) | 220(4) | -40(3) | -54(6) | -12(5) |
| C(114) | 172(7) | 107(5) | 128(5) | 9(4)   | 62(5)  | 13(5)  |
| Cl(1B) | 130(3) | 164(5) | 157(5) | -47(3) | -14(3) | -21(3) |
| Cl(2B) | 110(6) | 126(3) | 220(4) | -40(3) | -54(6) | -12(5) |
| C(115) | 172(7) | 107(5) | 128(5) | 9(4)   | 62(5)  | 13(5)  |
| Cl(3A) | 165(4) | 145(4) | 223(6) | 13(4)  | -57(5) | 9(3)   |
| Cl(4A) | 208(5) | 241(6) | 213(5) | -21(5) | 98(4)  | -12(5) |

|        |        |        |        |        |        |        |
|--------|--------|--------|--------|--------|--------|--------|
| C(116) | 172(7) | 107(5) | 128(5) | 9(4)   | 62(5)  | 13(5)  |
| Cl(3B) | 165(4) | 145(4) | 223(6) | 13(4)  | -57(5) | 9(3)   |
| Cl(4B) | 208(5) | 241(6) | 213(5) | -21(5) | 98(4)  | -12(5) |
| C(117) | 172(7) | 107(5) | 128(5) | 9(4)   | 62(5)  | 13(5)  |
| Cl(5)  | 132(2) | 204(4) | 195(3) | -41(3) | -16(2) | 3(2)   |
| Cl(6)  | 123(2) | 160(3) | 202(3) | -1(2)  | 42(2)  | -21(2) |

**Table S6.** Hydrogen coordinates ( $\times 10^4$ ) and isotropic displacement parameters ( $\text{Å}^2 \times 10^3$ ) for BIPPD.

| x      | y    | z     | U(eq) |     |
|--------|------|-------|-------|-----|
| H(2A)  | 3313 | 6898  | 251   | 47  |
| H(3A)  | 5357 | 7546  | 868   | 54  |
| H(4A)  | 2670 | 8472  | -917  | 52  |
| H(6A)  | 1157 | 5917  | 5294  | 49  |
| H(7A)  | 1925 | 3946  | 5863  | 56  |
| H(8B)  | 2499 | 6422  | 4107  | 66  |
| H(10M) | 8753 | 2522  | 4696  | 47  |
| H(11I) | 8040 | 4495  | 4086  | 58  |
| H(12B) | 7341 | 2075  | 5854  | 52  |
| H(14A) | 6638 | 5405  | 4643  | 45  |
| H(15A) | 7294 | 6964  | 5811  | 54  |
| H(16B) | 4552 | 5982  | 4107  | 56  |
| H(8A)  | 3931 | 6288  | 1005  | 58  |
| H(10A) | 4667 | 5559  | 1877  | 71  |
| H(11A) | 5659 | 5539  | 2388  | 78  |
| H(12A) | 6469 | 6292  | 2273  | 81  |
| H(13A) | 6313 | 7085  | 1633  | 68  |
| H(16A) | 2110 | 6829  | -292  | 51  |
| H(18A) | 801  | 6814  | -919  | 63  |
| H(19A) | 141  | 7421  | -1523 | 72  |
| H(20A) | 517  | 8370  | -1869 | 72  |
| H(21A) | 1573 | 8755  | -1605 | 62  |
| H(23A) | 5113 | 9738  | -63   | 63  |
| H(23B) | 4491 | 9923  | -450  | 63  |
| H(24A) | 4883 | 9354  | -1116 | 69  |
| H(24B) | 5463 | 9062  | -735  | 69  |
| H(25A) | 5929 | 10129 | -631  | 81  |
| H(25B) | 5364 | 10393 | -1042 | 81  |
| H(26A) | 6275 | 9430  | -1287 | 102 |
| H(26B) | 5742 | 9755  | -1693 | 102 |
| H(27A) | 6804 | 10460 | -1166 | 135 |

|        |      |       |       |     |
|--------|------|-------|-------|-----|
| H(27B) | 6294 | 10745 | -1613 | 135 |
| H(28A) | 7271 | 10436 | -1966 | 228 |
| H(28B) | 7195 | 9716  | -1771 | 228 |
| H(28C) | 6686 | 10000 | -2217 | 228 |
| H(36A) | 673  | 5364  | 6054  | 64  |
| H(38A) | 150  | 4737  | 6942  | 95  |
| H(39A) | 282  | 3841  | 7469  | 104 |
| H(40A) | 1034 | 3031  | 7342  | 97  |
| H(41A) | 1671 | 3102  | 6655  | 77  |
| H(44A) | 987  | 7038  | 4778  | 68  |
| H(46A) | 819  | 8268  | 4141  | 112 |
| H(47A) | 1288 | 8789  | 3465  | 126 |
| H(48A) | 2176 | 8393  | 3135  | 149 |
| H(49A) | 2639 | 7402  | 3415  | 112 |
| H(51A) | 3934 | 4087  | 4927  | 59  |
| H(51B) | 4062 | 4666  | 4553  | 59  |
| H(52A) | 3179 | 3633  | 4243  | 66  |
| H(52B) | 3384 | 4185  | 3872  | 66  |
| H(53A) | 4278 | 3240  | 4336  | 84  |
| H(53B) | 4452 | 3771  | 3936  | 84  |
| H(54A) | 3501 | 2777  | 3662  | 113 |
| H(54B) | 3753 | 3273  | 3268  | 113 |
| H(55A) | 4786 | 2782  | 3364  | 200 |
| H(55B) | 4579 | 2318  | 3799  | 200 |
| H(56A) | 4557 | 1765  | 3034  | 337 |
| H(56B) | 3843 | 1805  | 3196  | 337 |
| H(56C) | 4050 | 2269  | 2761  | 337 |
| H(64A) | 9240 | 3026  | 3934  | 60  |
| H(66A) | 9820 | 3603  | 3051  | 83  |
| H(67A) | 9789 | 4528  | 2546  | 97  |
| H(68A) | 9080 | 5370  | 2672  | 96  |
| H(69A) | 8395 | 5328  | 3315  | 83  |
| H(72A) | 8886 | 1405  | 5248  | 52  |
| H(74A) | 8988 | 189   | 5890  | 62  |
| H(75A) | 8474 | -353  | 6501  | 70  |
| H(76A) | 7562 | 79    | 6828  | 70  |
| H(77A) | 7140 | 1091  | 6538  | 62  |
| H(79A) | 5844 | 3829  | 5354  | 60  |
| H(79B) | 5983 | 4390  | 4968  | 60  |
| H(80A) | 6691 | 4884  | 5669  | 62  |
| H(80B) | 6442 | 4359  | 6043  | 62  |
| H(81A) | 5590 | 5277  | 5486  | 66  |
| H(81B) | 5375 | 4780  | 5896  | 66  |
| H(82A) | 6270 | 5811  | 6150  | 77  |

|        |      |      |      |     |
|--------|------|------|------|-----|
| H(82B) | 6040 | 5321 | 6558 | 77  |
| H(83A) | 5191 | 6229 | 5998 | 99  |
| H(83B) | 4976 | 5750 | 6419 | 99  |
| H(84A) | 5124 | 6781 | 6760 | 170 |
| H(84B) | 5640 | 6305 | 7058 | 170 |
| H(84C) | 5856 | 6785 | 6637 | 170 |
| H(92A) | 7819 | 5305 | 5212 | 55  |
| H(94A) | 9122 | 5251 | 5857 | 72  |
| H(95A) | 9771 | 5835 | 6483 | 81  |
| H(96A) | 9414 | 6810 | 6814 | 83  |
| H(97A) | 8384 | 7223 | 6513 | 73  |
| H(10B) | 6045 | 4881 | 3829 | 63  |
| H(10C) | 5322 | 4233 | 2907 | 84  |
| H(10D) | 4303 | 4198 | 2418 | 91  |
| H(10E) | 3452 | 4834 | 2643 | 93  |
| H(10F) | 3595 | 5555 | 3337 | 79  |
| H(10G) | 4819 | 8204 | 5016 | 60  |
| H(10H) | 5452 | 8394 | 5390 | 60  |
| H(10I) | 4485 | 7554 | 5712 | 65  |
| H(10J) | 5072 | 7860 | 6077 | 65  |
| H(10K) | 4601 | 8891 | 5980 | 76  |
| H(10L) | 4037 | 8622 | 5571 | 76  |
| H(11B) | 4198 | 8304 | 6639 | 98  |
| H(11C) | 3665 | 7972 | 6238 | 98  |
| H(11D) | 3660 | 9307 | 6541 | 145 |
| H(11E) | 3170 | 9038 | 6078 | 145 |
| H(11F) | 2656 | 9101 | 6817 | 228 |
| H(11G) | 2695 | 8367 | 6647 | 228 |
| H(11H) | 3186 | 8635 | 7110 | 228 |
| H(11I) | 9014 | 1750 | 2103 | 159 |
| H(11J) | 9005 | 1306 | 2598 | 159 |
| H(11K) | 8993 | 2255 | 2266 | 159 |
| H(11L) | 9278 | 1549 | 2393 | 159 |
| H(11M) | 6787 | 5180 | 2053 | 159 |
| H(11N) | 7409 | 5552 | 2305 | 159 |
| H(11O) | 7640 | 4292 | 1856 | 159 |
| H(11P) | 8006 | 4079 | 2396 | 159 |
| H(11Q) | 6577 | 1704 | 7971 | 159 |
| H(11R) | 6281 | 2339 | 7696 | 159 |

---

**Table S7.** Torsion angles [deg] for BIPPD.

---

|                      |           |
|----------------------|-----------|
| C(4)-N(1)-C(1)-O(1)  | 178.6(4)  |
| C(23)-N(1)-C(1)-O(1) | 5.0(7)    |
| C(4)-N(1)-C(1)-C(2)  | -1.3(5)   |
| C(23)-N(1)-C(1)-C(2) | -174.8(4) |
| O(1)-C(1)-C(2)-C(3)  | 6.2(10)   |
| N(1)-C(1)-C(2)-C(3)  | -174.0(6) |
| O(1)-C(1)-C(2)-C(5)  | -178.2(5) |
| N(1)-C(1)-C(2)-C(5)  | 1.7(5)    |
| C(6)-N(2)-C(3)-C(2)  | -0.5(5)   |
| C(6)-N(2)-C(3)-C(7)  | 177.7(4)  |
| C(5)-C(2)-C(3)-N(2)  | 0.6(5)    |
| C(1)-C(2)-C(3)-N(2)  | 176.2(6)  |
| C(5)-C(2)-C(3)-C(7)  | -177.5(4) |
| C(1)-C(2)-C(3)-C(7)  | -1.8(10)  |
| C(1)-N(1)-C(4)-O(2)  | 179.7(4)  |
| C(23)-N(1)-C(4)-O(2) | -6.7(7)   |
| C(1)-N(1)-C(4)-C(5)  | 0.4(5)    |
| C(23)-N(1)-C(4)-C(5) | 174.0(4)  |
| C(3)-C(2)-C(5)-C(6)  | -0.4(5)   |
| C(1)-C(2)-C(5)-C(6)  | -177.7(4) |
| C(3)-C(2)-C(5)-C(4)  | 175.7(4)  |
| C(1)-C(2)-C(5)-C(4)  | -1.5(5)   |
| O(2)-C(4)-C(5)-C(6)  | -4.5(10)  |
| N(1)-C(4)-C(5)-C(6)  | 174.7(6)  |
| O(2)-C(4)-C(5)-C(2)  | -178.5(5) |
| N(1)-C(4)-C(5)-C(2)  | 0.7(5)    |
| C(3)-N(2)-C(6)-C(5)  | 0.3(5)    |
| C(3)-N(2)-C(6)-C(15) | 179.3(4)  |
| C(2)-C(5)-C(6)-N(2)  | 0.1(5)    |
| C(4)-C(5)-C(6)-N(2)  | -174.0(6) |
| C(2)-C(5)-C(6)-C(15) | -178.9(4) |
| C(4)-C(5)-C(6)-C(15) | 7.1(9)    |
| C(14)-N(3)-C(7)-C(8) | -0.5(5)   |
| C(14)-N(3)-C(7)-C(3) | 176.8(4)  |
| N(2)-C(3)-C(7)-N(3)  | 177.3(4)  |
| C(2)-C(3)-C(7)-N(3)  | -5.0(7)   |
| N(2)-C(3)-C(7)-C(8)  | -6.1(7)   |
| C(2)-C(3)-C(7)-C(8)  | 171.6(5)  |
| N(3)-C(7)-C(8)-C(9)  | 0.6(5)    |
| C(3)-C(7)-C(8)-C(9)  | -176.3(4) |

|                         |           |
|-------------------------|-----------|
| C(7)-C(8)-C(9)-C(10)    | 179.4(5)  |
| C(7)-C(8)-C(9)-C(14)    | -0.5(5)   |
| C(14)-C(9)-C(10)-C(11)  | -0.2(7)   |
| C(8)-C(9)-C(10)-C(11)   | 180.0(5)  |
| C(9)-C(10)-C(11)-C(12)  | -0.3(8)   |
| C(10)-C(11)-C(12)-C(13) | -0.3(9)   |
| C(11)-C(12)-C(13)-C(14) | 1.3(8)    |
| C(7)-N(3)-C(14)-C(13)   | 179.1(5)  |
| C(7)-N(3)-C(14)-C(9)    | 0.2(5)    |
| C(12)-C(13)-C(14)-N(3)  | 179.4(5)  |
| C(12)-C(13)-C(14)-C(9)  | -1.8(7)   |
| C(10)-C(9)-C(14)-N(3)   | -179.7(4) |
| C(8)-C(9)-C(14)-N(3)    | 0.2(5)    |
| C(10)-C(9)-C(14)-C(13)  | 1.3(7)    |
| C(8)-C(9)-C(14)-C(13)   | -178.8(4) |
| C(22)-N(4)-C(15)-C(16)  | 0.2(5)    |
| C(22)-N(4)-C(15)-C(6)   | -179.8(4) |
| N(2)-C(6)-C(15)-N(4)    | -177.8(4) |
| C(5)-C(6)-C(15)-N(4)    | 1.0(6)    |
| N(2)-C(6)-C(15)-C(16)   | 2.1(7)    |
| C(5)-C(6)-C(15)-C(16)   | -179.1(5) |
| N(4)-C(15)-C(16)-C(17)  | -0.4(5)   |
| C(6)-C(15)-C(16)-C(17)  | 179.6(4)  |
| C(15)-C(16)-C(17)-C(18) | -177.2(5) |
| C(15)-C(16)-C(17)-C(22) | 0.5(5)    |
| C(22)-C(17)-C(18)-C(19) | -1.2(7)   |
| C(16)-C(17)-C(18)-C(19) | 176.4(5)  |
| C(17)-C(18)-C(19)-C(20) | 1.3(8)    |
| C(18)-C(19)-C(20)-C(21) | -0.6(8)   |
| C(19)-C(20)-C(21)-C(22) | -0.2(8)   |
| C(15)-N(4)-C(22)-C(21)  | 177.2(4)  |
| C(15)-N(4)-C(22)-C(17)  | 0.1(5)    |
| C(20)-C(21)-C(22)-N(4)  | -176.5(5) |
| C(20)-C(21)-C(22)-C(17) | 0.2(7)    |
| C(18)-C(17)-C(22)-N(4)  | 177.8(4)  |
| C(16)-C(17)-C(22)-N(4)  | -0.4(5)   |
| C(18)-C(17)-C(22)-C(21) | 0.5(7)    |
| C(16)-C(17)-C(22)-C(21) | -177.7(4) |
| C(1)-N(1)-C(23)-C(24)   | 86.4(6)   |
| C(4)-N(1)-C(23)-C(24)   | -86.5(5)  |
| N(1)-C(23)-C(24)-C(25)  | -171.4(4) |
| C(23)-C(24)-C(25)-C(26) | 176.2(5)  |
| C(24)-C(25)-C(26)-C(27) | -174.8(6) |
| C(25)-C(26)-C(27)-C(28) | 174.7(7)  |

|                         |           |
|-------------------------|-----------|
| C(32)-N(5)-C(29)-O(3)   | 178.1(4)  |
| C(51)-N(5)-C(29)-O(3)   | 2.5(7)    |
| C(32)-N(5)-C(29)-C(30)  | -1.1(5)   |
| C(51)-N(5)-C(29)-C(30)  | -176.7(4) |
| O(3)-C(29)-C(30)-C(31)  | 7.1(9)    |
| N(5)-C(29)-C(30)-C(31)  | -173.7(6) |
| O(3)-C(29)-C(30)-C(33)  | -177.6(4) |
| N(5)-C(29)-C(30)-C(33)  | 1.5(5)    |
| C(34)-N(6)-C(31)-C(30)  | -0.6(5)   |
| C(34)-N(6)-C(31)-C(35)  | 176.9(4)  |
| C(33)-C(30)-C(31)-N(6)  | 1.0(5)    |
| C(29)-C(30)-C(31)-N(6)  | 176.2(5)  |
| C(33)-C(30)-C(31)-C(35) | -176.4(4) |
| C(29)-C(30)-C(31)-C(35) | -1.1(9)   |
| C(29)-N(5)-C(32)-O(4)   | 179.0(4)  |
| C(51)-N(5)-C(32)-O(4)   | -5.4(7)   |
| C(29)-N(5)-C(32)-C(33)  | 0.3(5)    |
| C(51)-N(5)-C(32)-C(33)  | 175.9(4)  |
| C(31)-C(30)-C(33)-C(34) | -0.9(5)   |
| C(29)-C(30)-C(33)-C(34) | -178.0(4) |
| C(31)-C(30)-C(33)-C(32) | 175.6(4)  |
| C(29)-C(30)-C(33)-C(32) | -1.4(5)   |
| O(4)-C(32)-C(33)-C(34)  | -3.1(10)  |
| N(5)-C(32)-C(33)-C(34)  | 175.4(6)  |
| O(4)-C(32)-C(33)-C(30)  | -177.8(5) |
| N(5)-C(32)-C(33)-C(30)  | 0.7(5)    |
| C(31)-N(6)-C(34)-C(33)  | 0.1(5)    |
| C(31)-N(6)-C(34)-C(43)  | 178.2(4)  |
| C(30)-C(33)-C(34)-N(6)  | 0.5(5)    |
| C(32)-C(33)-C(34)-N(6)  | -174.2(6) |
| C(30)-C(33)-C(34)-C(43) | -177.5(4) |
| C(32)-C(33)-C(34)-C(43) | 7.8(9)    |
| C(42)-N(7)-C(35)-C(36)  | -1.7(5)   |
| C(42)-N(7)-C(35)-C(31)  | 174.5(4)  |
| N(6)-C(31)-C(35)-N(7)   | 179.0(4)  |
| C(30)-C(31)-C(35)-N(7)  | -4.1(7)   |
| N(6)-C(31)-C(35)-C(36)  | -5.8(7)   |
| C(30)-C(31)-C(35)-C(36) | 171.1(5)  |
| N(7)-C(35)-C(36)-C(37)  | 1.8(5)    |
| C(31)-C(35)-C(36)-C(37) | -173.8(4) |
| C(35)-C(36)-C(37)-C(38) | 179.1(6)  |
| C(35)-C(36)-C(37)-C(42) | -1.3(6)   |
| C(42)-C(37)-C(38)-C(39) | 1.8(9)    |
| C(36)-C(37)-C(38)-C(39) | -178.7(7) |



|                         |           |
|-------------------------|-----------|
| C(37)-C(38)-C(39)-C(40) | -1.2(12)  |
| C(38)-C(39)-C(40)-C(41) | -0.7(12)  |
| C(39)-C(40)-C(41)-C(42) | 1.9(10)   |
| C(35)-N(7)-C(42)-C(41)  | -178.7(5) |
| C(35)-N(7)-C(42)-C(37)  | 0.9(5)    |
| C(40)-C(41)-C(42)-N(7)  | 178.2(5)  |
| C(40)-C(41)-C(42)-C(37) | -1.3(8)   |
| C(38)-C(37)-C(42)-N(7)  | 179.9(5)  |
| C(36)-C(37)-C(42)-N(7)  | 0.3(5)    |
| C(38)-C(37)-C(42)-C(41) | -0.5(8)   |
| C(36)-C(37)-C(42)-C(41) | 179.8(5)  |
| C(50)-N(8)-C(43)-C(44)  | 0.5(6)    |
| C(50)-N(8)-C(43)-C(34)  | 178.4(4)  |
| N(6)-C(34)-C(43)-N(8)   | -175.5(4) |
| C(33)-C(34)-C(43)-N(8)  | 2.2(7)    |
| N(6)-C(34)-C(43)-C(44)  | 1.9(8)    |
| C(33)-C(34)-C(43)-C(44) | 179.6(5)  |
| N(8)-C(43)-C(44)-C(45)  | -0.6(5)   |
| C(34)-C(43)-C(44)-C(45) | -178.2(5) |
| C(43)-C(44)-C(45)-C(50) | 0.6(6)    |
| C(43)-C(44)-C(45)-C(46) | -178.4(7) |
| C(44)-C(45)-C(46)-C(47) | 179.4(6)  |
| C(50)-C(45)-C(46)-C(47) | 0.5(9)    |
| C(45)-C(46)-C(47)-C(48) | -2.1(12)  |
| C(46)-C(47)-C(48)-C(49) | 2.0(15)   |
| C(47)-C(48)-C(49)-C(50) | -0.4(13)  |
| C(43)-N(8)-C(50)-C(49)  | 177.7(6)  |
| C(43)-N(8)-C(50)-C(45)  | -0.1(6)   |
| C(48)-C(49)-C(50)-N(8)  | -178.5(7) |
| C(48)-C(49)-C(50)-C(45) | -1.1(10)  |
| C(44)-C(45)-C(50)-N(8)  | -0.3(6)   |
| C(46)-C(45)-C(50)-N(8)  | 178.9(5)  |
| C(44)-C(45)-C(50)-C(49) | -178.2(6) |
| C(46)-C(45)-C(50)-C(49) | 1.0(9)    |
| C(29)-N(5)-C(51)-C(52)  | 87.7(5)   |
| C(32)-N(5)-C(51)-C(52)  | -87.5(5)  |
| N(5)-C(51)-C(52)-C(53)  | -173.9(4) |
| C(51)-C(52)-C(53)-C(54) | 176.3(5)  |
| C(52)-C(53)-C(54)-C(55) | -173.6(8) |
| C(53)-C(54)-C(55)-C(56) | 174.6(12) |
| C(60)-N(9)-C(57)-O(5)   | -178.9(4) |
| C(79)-N(9)-C(57)-O(5)   | 0.9(7)    |
| C(60)-N(9)-C(57)-C(58)  | 0.1(5)    |
| C(79)-N(9)-C(57)-C(58)  | 179.9(4)  |

|                         |           |
|-------------------------|-----------|
| O(5)-C(57)-C(58)-C(59)  | -6.3(10)  |
| N(9)-C(57)-C(58)-C(59)  | 174.8(6)  |
| O(5)-C(57)-C(58)-C(61)  | 178.1(4)  |
| N(9)-C(57)-C(58)-C(61)  | -0.8(5)   |
| C(61)-C(58)-C(59)-N(10) | -0.5(5)   |
| C(57)-C(58)-C(59)-N(10) | -176.2(6) |
| C(61)-C(58)-C(59)-C(63) | 176.1(4)  |
| C(57)-C(58)-C(59)-C(63) | 0.5(10)   |
| C(62)-N(10)-C(59)-C(58) | 0.4(5)    |
| C(62)-N(10)-C(59)-C(63) | -176.6(4) |
| C(57)-N(9)-C(60)-O(6)   | -178.5(4) |
| C(79)-N(9)-C(60)-O(6)   | 1.7(7)    |
| C(57)-N(9)-C(60)-C(61)  | 0.7(5)    |
| C(79)-N(9)-C(60)-C(61)  | -179.1(4) |
| C(59)-C(58)-C(61)-C(62) | 0.5(5)    |
| C(57)-C(58)-C(61)-C(62) | 177.7(4)  |
| C(59)-C(58)-C(61)-C(60) | -176.0(4) |
| C(57)-C(58)-C(61)-C(60) | 1.2(5)    |
| O(6)-C(60)-C(61)-C(62)  | 3.4(10)   |
| N(9)-C(60)-C(61)-C(62)  | -175.6(6) |
| O(6)-C(60)-C(61)-C(58)  | 177.9(5)  |
| N(9)-C(60)-C(61)-C(58)  | -1.1(5)   |
| C(58)-C(61)-C(62)-N(10) | -0.2(5)   |
| C(60)-C(61)-C(62)-N(10) | 174.3(6)  |
| C(58)-C(61)-C(62)-C(71) | 177.7(4)  |
| C(60)-C(61)-C(62)-C(71) | -7.8(9)   |
| C(59)-N(10)-C(62)-C(61) | -0.2(5)   |
| C(59)-N(10)-C(62)-C(71) | -178.1(4) |
| C(70)-N(11)-C(63)-C(64) | 0.8(5)    |
| C(70)-N(11)-C(63)-C(59) | -177.0(4) |
| C(58)-C(59)-C(63)-C(64) | -170.7(5) |
| N(10)-C(59)-C(63)-C(64) | 5.5(7)    |
| C(58)-C(59)-C(63)-N(11) | 6.5(7)    |
| N(10)-C(59)-C(63)-N(11) | -177.3(4) |
| N(11)-C(63)-C(64)-C(65) | -0.7(5)   |
| C(59)-C(63)-C(64)-C(65) | 176.7(4)  |
| C(63)-C(64)-C(65)-C(70) | 0.4(6)    |
| C(63)-C(64)-C(65)-C(66) | -177.6(6) |
| C(70)-C(65)-C(66)-C(67) | 2.0(9)    |
| C(64)-C(65)-C(66)-C(67) | 179.8(6)  |
| C(65)-C(66)-C(67)-C(68) | -0.9(10)  |
| C(66)-C(67)-C(68)-C(69) | 0.3(11)   |
| C(67)-C(68)-C(69)-C(70) | -0.9(10)  |
| C(63)-N(11)-C(70)-C(69) | -179.3(5) |

|                          |           |
|--------------------------|-----------|
| C(63)-N(11)-C(70)-C(65)  | -0.5(5)   |
| C(68)-C(69)-C(70)-N(11)  | -179.3(6) |
| C(68)-C(69)-C(70)-C(65)  | 2.0(8)    |
| C(66)-C(65)-C(70)-N(11)  | 178.4(5)  |
| C(64)-C(65)-C(70)-N(11)  | 0.1(5)    |
| C(66)-C(65)-C(70)-C(69)  | -2.6(8)   |
| C(64)-C(65)-C(70)-C(69)  | 179.0(5)  |
| C(78)-N(12)-C(71)-C(72)  | 0.5(5)    |
| C(78)-N(12)-C(71)-C(62)  | 179.8(4)  |
| C(61)-C(62)-C(71)-C(72)  | 179.8(5)  |
| N(10)-C(62)-C(71)-C(72)  | -2.8(7)   |
| C(61)-C(62)-C(71)-N(12)  | 0.7(7)    |
| N(10)-C(62)-C(71)-N(12)  | 178.2(4)  |
| N(12)-C(71)-C(72)-C(73)  | -0.4(5)   |
| C(62)-C(71)-C(72)-C(73)  | -179.5(4) |
| C(71)-C(72)-C(73)-C(74)  | 177.7(5)  |
| C(71)-C(72)-C(73)-C(78)  | 0.2(5)    |
| C(78)-C(73)-C(74)-C(75)  | 0.4(7)    |
| C(72)-C(73)-C(74)-C(75)  | -176.8(5) |
| C(73)-C(74)-C(75)-C(76)  | 0.0(8)    |
| C(74)-C(75)-C(76)-C(77)  | -0.1(8)   |
| C(75)-C(76)-C(77)-C(78)  | -0.3(7)   |
| C(71)-N(12)-C(78)-C(77)  | -177.1(4) |
| C(71)-N(12)-C(78)-C(73)  | -0.4(5)   |
| C(76)-C(77)-C(78)-N(12)  | 177.2(5)  |
| C(76)-C(77)-C(78)-C(73)  | 0.8(7)    |
| C(74)-C(73)-C(78)-N(12)  | -177.9(4) |
| C(72)-C(73)-C(78)-N(12)  | 0.1(5)    |
| C(74)-C(73)-C(78)-C(77)  | -0.9(7)   |
| C(72)-C(73)-C(78)-C(77)  | 177.1(4)  |
| C(57)-N(9)-C(79)-C(80)   | -89.9(5)  |
| C(60)-N(9)-C(79)-C(80)   | 89.9(5)   |
| N(9)-C(79)-C(80)-C(81)   | 171.4(4)  |
| C(79)-C(80)-C(81)-C(82)  | -175.4(4) |
| C(80)-C(81)-C(82)-C(83)  | 178.8(5)  |
| C(81)-C(82)-C(83)-C(84)  | -178.2(6) |
| C(88)-N(13)-C(85)-O(7)   | 179.1(4)  |
| C(107)-N(13)-C(85)-O(7)  | -4.9(7)   |
| C(88)-N(13)-C(85)-C(86)  | 0.8(5)    |
| C(107)-N(13)-C(85)-C(86) | 176.9(4)  |
| O(7)-C(85)-C(86)-C(87)   | -2.5(10)  |
| N(13)-C(85)-C(86)-C(87)  | 175.5(5)  |
| O(7)-C(85)-C(86)-C(89)   | -177.4(5) |
| N(13)-C(85)-C(86)-C(89)  | 0.7(5)    |

|                          |           |
|--------------------------|-----------|
| C(89)-C(86)-C(87)-N(14)  | 0.7(4)    |
| C(85)-C(86)-C(87)-N(14)  | -174.1(5) |
| C(89)-C(86)-C(87)-C(91)  | -177.0(4) |
| C(85)-C(86)-C(87)-C(91)  | 8.2(9)    |
| C(90)-N(14)-C(87)-C(86)  | -0.5(4)   |
| C(90)-N(14)-C(87)-C(91)  | 177.4(4)  |
| C(85)-N(13)-C(88)-O(8)   | 176.4(4)  |
| C(107)-N(13)-C(88)-O(8)  | 0.4(7)    |
| C(85)-N(13)-C(88)-C(89)  | -1.9(5)   |
| C(107)-N(13)-C(88)-C(89) | -177.9(4) |
| C(87)-C(86)-C(89)-C(90)  | -0.7(5)   |
| C(85)-C(86)-C(89)-C(90)  | 175.8(4)  |
| C(87)-C(86)-C(89)-C(88)  | -178.4(3) |
| C(85)-C(86)-C(89)-C(88)  | -1.9(5)   |
| O(8)-C(88)-C(89)-C(90)   | 7.8(9)    |
| N(13)-C(88)-C(89)-C(90)  | -174.0(6) |
| O(8)-C(88)-C(89)-C(86)   | -175.9(4) |
| N(13)-C(88)-C(89)-C(86)  | 2.3(4)    |
| C(86)-C(89)-C(90)-N(14)  | 0.4(4)    |
| C(88)-C(89)-C(90)-N(14)  | 176.7(5)  |
| C(86)-C(89)-C(90)-C(99)  | -175.2(4) |
| C(88)-C(89)-C(90)-C(99)  | 1.0(9)    |
| C(87)-N(14)-C(90)-C(89)  | 0.0(4)    |
| C(87)-N(14)-C(90)-C(99)  | 176.2(4)  |
| C(98)-N(15)-C(91)-C(92)  | 0.0(5)    |
| C(98)-N(15)-C(91)-C(87)  | 178.8(4)  |
| C(86)-C(87)-C(91)-C(92)  | 176.3(5)  |
| N(14)-C(87)-C(91)-C(92)  | -1.0(7)   |
| C(86)-C(87)-C(91)-N(15)  | -2.1(6)   |
| N(14)-C(87)-C(91)-N(15)  | -179.5(4) |
| N(15)-C(91)-C(92)-C(93)  | -0.3(5)   |
| C(87)-C(91)-C(92)-C(93)  | -178.8(4) |
| C(91)-C(92)-C(93)-C(94)  | -179.3(5) |
| C(91)-C(92)-C(93)-C(98)  | 0.5(5)    |
| C(98)-C(93)-C(94)-C(95)  | -0.8(7)   |
| C(92)-C(93)-C(94)-C(95)  | 179.0(5)  |
| C(93)-C(94)-C(95)-C(96)  | 0.5(9)    |
| C(94)-C(95)-C(96)-C(97)  | -0.1(9)   |
| C(95)-C(96)-C(97)-C(98)  | -0.1(9)   |
| C(91)-N(15)-C(98)-C(97)  | 178.9(5)  |
| C(91)-N(15)-C(98)-C(93)  | 0.3(5)    |
| C(96)-C(97)-C(98)-N(15)  | -178.6(5) |
| C(96)-C(97)-C(98)-C(93)  | -0.2(8)   |
| C(94)-C(93)-C(98)-N(15)  | 179.3(4)  |

|                             |           |
|-----------------------------|-----------|
| C(92)-C(93)-C(98)-N(15)     | -0.5(5)   |
| C(94)-C(93)-C(98)-C(97)     | 0.6(7)    |
| C(92)-C(93)-C(98)-C(97)     | -179.2(5) |
| C(106)-N(16)-C(99)-C(100)   | 0.1(5)    |
| C(106)-N(16)-C(99)-C(90)    | 175.4(4)  |
| C(89)-C(90)-C(99)-C(100)    | 163.4(5)  |
| N(14)-C(90)-C(99)-C(100)    | -11.6(7)  |
| C(89)-C(90)-C(99)-N(16)     | -10.8(7)  |
| N(14)-C(90)-C(99)-N(16)     | 174.2(4)  |
| N(16)-C(99)-C(100)-C(101)   | 0.8(5)    |
| C(90)-C(99)-C(100)-C(101)   | -174.0(4) |
| C(99)-C(100)-C(101)-C(106)  | -1.3(5)   |
| C(99)-C(100)-C(101)-C(102)  | 178.0(6)  |
| C(106)-C(101)-C(102)-C(103) | -0.6(8)   |
| C(100)-C(101)-C(102)-C(103) | -179.8(6) |
| C(101)-C(102)-C(103)-C(104) | -0.6(10)  |
| C(102)-C(103)-C(104)-C(105) | 1.4(11)   |
| C(103)-C(104)-C(105)-C(106) | -1.0(10)  |
| C(99)-N(16)-C(106)-C(105)   | -179.9(5) |
| C(99)-N(16)-C(106)-C(101)   | -0.9(5)   |
| C(104)-C(105)-C(106)-N(16)  | 178.6(5)  |
| C(104)-C(105)-C(106)-C(101) | -0.2(8)   |
| C(102)-C(101)-C(106)-N(16)  | -178.1(5) |
| C(100)-C(101)-C(106)-N(16)  | 1.3(5)    |
| C(102)-C(101)-C(106)-C(105) | 1.0(8)    |
| C(100)-C(101)-C(106)-C(105) | -179.6(5) |
| C(88)-N(13)-C(107)-C(108)   | 88.0(5)   |
| C(85)-N(13)-C(107)-C(108)   | -87.6(5)  |
| N(13)-C(107)-C(108)-C(109)  | -170.7(4) |
| C(107)-C(108)-C(109)-C(110) | 174.5(5)  |
| C(108)-C(109)-C(110)-C(111) | -174.7(6) |
| C(109)-C(110)-C(111)-C(112) | 171.5(9)  |

---

Symmetry transformations used to generate equivalent atoms:

**Table S8.** Hydrogen bonds for BIPPD [A and deg.].

---

| D-H...A                 | d(D-H) | d(H...A) | d(D...A)  | <(DHA) |
|-------------------------|--------|----------|-----------|--------|
| N(2)-H(2A)...O(3)#1     | 0.86   | 1.99     | 2.847(4)  | 174.7  |
| N(3)-H(3A)...O(1)       | 0.86   | 2.43     | 3.187(5)  | 147.5  |
| N(4)-H(4A)...O(2)       | 0.86   | 2.18     | 2.975(5)  | 153.4  |
| N(6)-H(6A)...O(1)#2     | 0.86   | 2.04     | 2.898(4)  | 171.6  |
| N(7)-H(7A)...O(3)       | 0.86   | 2.38     | 3.140(5)  | 147.9  |
| N(8)-H(8B)...O(4)       | 0.86   | 2.23     | 3.023(5)  | 152.8  |
| N(10)-H(10M)...O(8)#3   | 0.86   | 2.05     | 2.901(4)  | 173.6  |
| N(11)-H(11I)...O(5)     | 0.86   | 2.40     | 3.157(5)  | 147.5  |
| N(12)-H(12B)...O(6)     | 0.86   | 2.19     | 2.985(5)  | 153.9  |
| N(14)-H(14A)...O(5)     | 0.86   | 2.02     | 2.873(4)  | 169.6  |
| N(15)-H(15A)...O(7)     | 0.86   | 2.18     | 2.982(5)  | 155.1  |
| N(16)-H(16B)...O(8)     | 0.86   | 2.46     | 3.200(5)  | 144.8  |
| C(13)-H(13A)...O(6)#1   | 0.93   | 2.64     | 3.147(6)  | 114.8  |
| C(16)-H(16A)...O(3)#1   | 0.93   | 2.62     | 3.415(5)  | 144.4  |
| C(44)-H(44A)...O(1)#2   | 0.93   | 2.53     | 3.349(7)  | 146.5  |
| C(49)-H(49A)...Cl(1B)#4 | 0.93   | 2.86     | 3.784(16) | 171.5  |
| C(69)-H(69A)...O(2)#5   | 0.93   | 2.65     | 3.186(7)  | 117.3  |
| C(92)-H(92A)...O(5)     | 0.93   | 2.61     | 3.421(6)  | 145.5  |
| C(105)-H(10F)...O(4)    | 0.93   | 2.63     | 3.231(6)  | 123.0  |

---

Symmetry transformations used to generate equivalent atoms:

#1  $x, -y+1, z-1/2$  #2  $x-1/2, -y+3/2, z+1/2$  #3  $x+1/2, y-1/2, z$ #4  $x-1/2, y+1/2, z$  #5  $x+1/2, -y+3/2, z+1/2$

## 6. Equal K/ Dimerization

$$K = 2.55 \times 10^6 \text{ M}^{-1} \pm 3\%$$

<http://app.supramolecular.org/bindfit/view/16c094f4-1c8c-4f70-859a-a5e4f9f996ea>

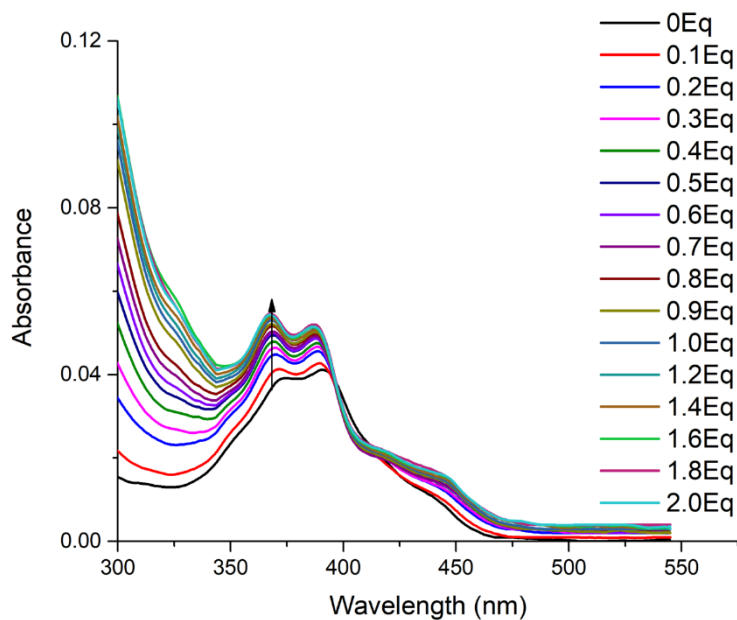

**Figure S15.** UV-visible binding studies of BIPPD in addition of TBA-H<sub>2</sub>PO<sub>4</sub> in chlorobenzene collected at 298 K. Experiments were performed with the same concentration of complex BIPPD.

## 7. Computational Details

### Energy Minimization Output:

SCF total energy: -2085.0547952 hartrees

Cartesian Coordinates (Angstroms)

| Atom    | X          | Y          | Z          |
|---------|------------|------------|------------|
| 1 N N1  | 3.1796248  | 0.0044593  | -0.9698025 |
| 2 C C1  | 2.4432477  | 1.1839964  | -0.8517044 |
| 3 C C2  | 2.4053403  | -1.1550844 | -0.8735672 |
| 4 O O1  | 2.9235464  | 2.2730021  | -0.9095640 |
| 5 O O2  | 2.8516628  | -2.2551150 | -0.9679451 |
| 6 C C3  | 1.0584510  | 0.7391698  | -0.6606267 |
| 7 C C4  | 1.0359491  | -0.6703249 | -0.6642120 |
| 8 C C5  | -0.2149818 | 1.1870147  | -0.4553187 |
| 9 C C6  | -0.2517374 | -1.0795387 | -0.4576861 |
| 10 N N2 | -0.9926004 | 0.0651510  | -0.3373979 |

|          |            |            |            |
|----------|------------|------------|------------|
| 11 H H5  | -1.9975194 | 0.0988116  | -0.2435785 |
| 12 C C7  | 4.6138193  | -0.0167621 | -1.1828375 |
| 13 H H2  | 4.8681193  | 0.8647480  | -1.7577640 |
| 14 H H1  | 4.8389477  | -0.8918216 | -1.7793663 |
| 15 C C8  | -0.8097817 | -2.4246907 | -0.3711514 |
| 16 C C9  | -0.7420568 | 2.5427231  | -0.3580290 |
| 17 N N3  | -2.0514980 | -2.6962788 | 0.1469779  |
| 18 H H9  | -2.6979047 | -2.0760055 | 0.6025132  |
| 19 N N4  | -2.0688518 | 2.7984384  | -0.1248327 |
| 20 H H8  | -2.7946573 | 2.1051806  | -0.0454009 |
| 21 C C10 | -0.2140265 | -3.5804744 | -0.7741638 |
| 22 H H4  | 0.7604918  | -3.6573861 | -1.2080354 |
| 23 C C11 | -1.1345619 | -4.6400591 | -0.4893124 |
| 24 C C12 | -3.3199117 | -6.1447181 | 0.3208367  |
| 25 C C13 | -2.2621517 | -4.0406486 | 0.0872134  |
| 26 C C14 | -1.1126225 | -6.0308679 | -0.6648770 |
| 27 C C15 | -2.1982943 | -6.7683559 | -0.2611920 |
| 28 C C16 | -3.3698269 | -4.7843132 | 0.5028191  |
| 29 H H12 | -0.2569212 | -6.5114848 | -1.1070565 |
| 30 H H13 | -2.1977884 | -7.8372105 | -0.3877397 |
| 31 H H14 | -4.2190411 | -4.2953157 | 0.9437393  |
| 32 H H15 | -4.1554988 | -6.7498999 | 0.6277251  |
| 33 C C17 | -0.0533240 | 3.7127030  | -0.4623396 |
| 34 H H16 | 0.9982510  | 3.8015155  | -0.6369571 |
| 35 C C18 | -1.0092933 | 4.7650455  | -0.2863654 |
| 36 C C19 | -3.3145743 | 6.2540551  | 0.1298019  |
| 37 C C20 | -0.9329207 | 6.1639540  | -0.2829702 |
| 38 C C21 | -2.2515788 | 4.1458450  | -0.0793195 |
| 39 C C22 | -3.4182816 | 4.8837502  | 0.1328574  |
| 40 C C23 | -2.0783821 | 6.8944843  | -0.0774043 |
| 41 H H3  | 0.0106093  | 6.6578512  | -0.4391705 |
| 42 H H18 | -4.3602602 | 4.3921698  | 0.2981683  |
| 43 H H19 | -2.0355751 | 7.9697694  | -0.0719079 |
| 44 H H20 | -4.1951395 | 6.8513552  | 0.2917744  |
| 45 P P1  | -4.7398193 | -0.1551105 | 0.7909925  |
| 46 O O3  | -3.7951942 | 0.6003987  | -0.0754177 |
| 47 O O4  | -5.2450056 | 0.8485634  | 1.9398774  |
| 48 O O5  | -6.0687298 | -0.4228914 | -0.0678416 |
| 49 O O6  | -4.3008307 | -1.4150733 | 1.4125667  |
| 50 H H7  | -5.4392030 | 0.3898467  | 2.7389238  |
| 51 H H11 | -6.1356872 | 0.1637871  | -0.8011232 |
| 52 C C24 | 5.4085354  | -0.0462454 | 0.1211896  |
| 53 H H10 | 5.1138697  | -0.9235775 | 0.6916908  |
| 54 H H17 | 5.1430318  | 0.8260486  | 0.7133958  |



|      |     |            |            |            |
|------|-----|------------|------------|------------|
| 55 C | C25 | 6.9170735  | -0.0683206 | -0.1208972 |
| 56 H | H6  | 7.1729841  | -0.9381105 | -0.7256907 |
| 57 H | H22 | 7.2019280  | 0.8068068  | -0.7047426 |
| 58 C | C26 | 7.7332977  | -0.0973605 | 1.1712539  |
| 59 H | H23 | 7.4487175  | -0.9715372 | 1.7558312  |
| 60 H | H24 | 7.4774464  | 0.7712944  | 1.7770119  |
| 61 C | C27 | 9.2437051  | -0.1194296 | 0.9364698  |
| 62 H | H21 | 9.5010011  | -0.9881166 | 0.3322978  |
| 63 H | H26 | 9.5297340  | 0.7541542  | 0.3525845  |
| 64 C | C28 | 10.0532992 | -0.1479082 | 2.2319760  |
| 65 H | H25 | 11.1211474 | -0.1645230 | 2.0299792  |
| 66 H | H27 | 9.8142423  | -1.0279184 | 2.8241274  |
| 67   | H28 | 9.8451912  | 0.7269269  | 2.8432039  |

### References

- [1] S. K. Pollack, Y. M. Hijji, B. Kgobane, *Macromolecules* **1997**, *30*, 6709-6711.
- [2] J. T. Brewster, H. Zafar, M. McVeigh, C. D. Wight, G. Anguera, A. Steinbrück, V. M. Lynch, J. L. Sessler, *J. Org. Chem.*, **2018**, *83*, 9568-9570.
